# 1 Conversion of marginal land into switchgrass conditionally 2 accrues soil carbon and reduces methane consumption

3 Colin T. Bates,<sup>1,2</sup> Arthur Escalas,<sup>3</sup> Jialiang Kuang<sup>1</sup>, Lauren Hale,<sup>4</sup> Yuan Wang,<sup>5</sup> Don Herman,<sup>6,9</sup>  
4 Erin E. Nuccio,<sup>6</sup> Xiaoling Wang,<sup>7</sup> Ying Fu,<sup>1,2</sup> Renmao Tian,<sup>1,2</sup> Gangsheng Wang,<sup>1,2</sup> Daliang  
5 Ning,<sup>1,2</sup> Yunfeng Yang,<sup>8</sup> Liyou Wu,<sup>1,2</sup> Jennifer Pett-Ridge,<sup>6</sup> Malay Saha,<sup>5</sup> Kelly Craven,<sup>5</sup> Mary  
6 Firestone,<sup>10</sup> and Jizhong Zhou<sup>1,2, 8, 10</sup>

7  
8 <sup>1</sup> The Institute for Environmental Genomics, University of Oklahoma, Norman, OK, USA  
9 <sup>2</sup> Department of Microbiology and Plant Biology, and School of Civil Engineering  
10 and Environmental Sciences, University of Oklahoma, Norman, OK, USA

11 <sup>3</sup> MARBEC, University of Montpellier, Montpellier, France

12 <sup>4</sup> USDA, Agricultural Research Service, San Joaquin Valley Agricultural Sciences Center,  
13 9611 South Riverbend Avenue, Parlier, CA 93648-9757, USA

14 <sup>5</sup> Noble Research Institute, Ardmore, OK

15 <sup>6</sup> Physical and Life Sciences Directorate, Lawrence Livermore National Laboratory,  
16 Livermore, CA 94551, USA

17 <sup>7</sup> The Key Laboratory of Aquatic Biodiversity and Conservation of the Chinese Academy  
18 of Sciences; Institute of Hydrobiology, Chinese Academy of Sciences, Wuhan 430072,  
19 China

20 <sup>8</sup> State Key Joint Laboratory of Environment Simulation and Pollution Control, School of  
21 Environment, Tsinghua University, Beijing 100084, China

22 <sup>9</sup> Department of Environmental Science, Policy and Management, University of California,  
23 Berkeley, CA 94720, USA

24 <sup>10</sup> Earth and Environmental Sciences, Lawrence Berkeley National Laboratory, Berkeley,  
25 CA 94270, USA  
26

## 27 Abstract

28 Switchgrass (*Panicum virgatum* L.) is a perennial C<sub>4</sub> grass native to tallgrass prairies of  
29 the Central US, and a promising bioenergy feedstock. Switchgrass can be cultivated on soils with  
30 low nutrient contents and its rooting depth, of up to 2 m, has brought attention to the crop as a  
31 potential mechanism to sequester and build soil carbon (C). Switchgrass, therefore, offers  
32 multifaceted benefits on degraded soils by enhancing soil organic matter content. However, to  
33 evaluate the sustainability of switchgrass-based biofuel production, it is crucial to understand the  
34 impacts of land conversion and switchgrass establishment on biotic/abiotic characteristics of

35 various soils. In this study, we characterized the ecosystem-scale consequences of switchgrass  
36 growing at two highly-eroded, ‘Dust Bowl’ remnant field sites from Oklahoma US, with silt-  
37 loam (SL) or clay-loam (CL) soil textures having low nitrogen (N), phosphorus (P), and C  
38 contents. Paired plots at each site, including fallow control and switchgrass-cultivated, were  
39 assessed. Our results indicated that switchgrass significantly increased soil C at the SL site and  
40 reduced microbial diversity at the CL site. The CL site exhibited significantly higher CO<sub>2</sub> flux  
41 and higher respiration from switchgrass plots. Strikingly, switchgrass significantly reduced the  
42 CH<sub>4</sub> consumption by an estimated 39% for the SL site and 47% for the CL site. Structural  
43 equation modeling identified soil temperature, P content, and soil moisture levels as the most  
44 influential factors regulating both CO<sub>2</sub> and CH<sub>4</sub> fluxes. CO<sub>2</sub> flux was also influenced by  
45 microbial biomass while CH<sub>4</sub> flux was influenced by microbial diversity. Together, our results  
46 suggest that site selection by soil type is a crucial factor in improving soil C stocks and  
47 mitigating greenhouse gas (GHG) fluxes, especially considering our finding that switchgrass  
48 reduced methane consumption, implying that carbon balance considerations should be accounted  
49 for to fully evaluate the sustainability of switchgrass cultivation.

50 Key words: Greenhouse Gases, Carbon Dioxide, Methane, Nitrous Oxide, Switchgrass,  
51 Soil Organic Matter, Carbon Sequestration, Biofuel

## 52 **Introduction**

53 Taking place over three waves during the 1930s, The American ‘Dust Bowl’ was a  
54 catastrophic ecological disaster that brought severe drought and dust storms to the central  
55 prairies and affected roughly 40 million hectares of land (Schubert et al., 2004; Worst, 1982;  
56 Baumhardt, 2003). Strong wind erosion exacerbated the topsoil displacement, creating many

57 ‘marginal’ lands of low soil nutrient quality across Oklahoma and the Southwestern US (Texas,  
58 Kansas, Colorado, and New Mexico). Since then, many of these sites have remained a ‘poor’ fit  
59 for agricultural development. It has been suggested that the implementation of deep-rooted  
60 perennial grasses may aid in soil restoration at these sites, offering economic benefits to farmers  
61 in the form of cellulosic feedstock for bioenergy production (Gelfand et al., 2013).

62 Switchgrass (*Panicum virgatum* L.), a tall perennial deep-rooted grass native to the Central  
63 North American Plains, is an auspicious bioenergy crop suitable for future large-scale cultivation  
64 in the US (McLaughlin and Kszos, 2005). This enthusiasm for switchgrass stems from its  
65 excellent ability to exhibit high biomass even on low-quality soils unfit for traditional  
66 agricultural practices, with little to no additional inputs (Tilman et al., 2006). Long-term  
67 cultivation experiments have suggested that switchgrass can improve soil productivity through  
68 the net input of soil C (Gelfand et al., 2013, Ma et al., 2000). Therefore, large-scale switchgrass  
69 cultivation may offset GHG emissions and serve as a means for improved soil fertility through C  
70 sequestration at nutrient-poor sites (Anderson-Teixeria et al., 2009). Switchgrass is also known  
71 to be highly drought tolerant (Barney et al., 2009) and can prevent topsoil erosion -two major  
72 problems in the Central and Southwestern USA including states of OK, TX, KS, CO, and NM. It  
73 is estimated that 15 million hectares of arable land would need to be converted into biofuel crop  
74 in order to meet the US Department of Energy’s plan to replace 30% of transportation fossil fuels  
75 with biofuels by 2030 (Bouton, 2007; Bouton, 2008). An estimated 11% of the contiguous US is  
76 considered nutrient-poor or ‘marginal’ land (Milbrandt et al., 2014) and currently represent an  
77 under-utilized resource that may be well suited for switchgrass cultivation (Stoof et al., 2015).  
78 Since perennial crop systems have high root biomass and exudates, they can improve soil C  
79 stability and aggregate formation (Tiemann and Grandy, 2015). Like other perennial crops,

80 Switchgrass has been broadly associated with increases in soil C at many different sites in the  
81 central and northern Great American Plains (Liebig et al., 2008; Zan et al., 2001; Frank et al.,  
82 2004; Dabney et al., 2004). However, this potential C accrual may be offset by higher soil  
83 respiration arising from stimulated microbial C mineralization or increased root respiration.

84 Because soil microorganisms are critical drivers of soil nutrient cycling, understanding  
85 plant-microbe interactions during switchgrass cultivation could inform land management  
86 strategies toward the promoting of soil nutrient acquisition and recycling, along with reducing  
87 GHG emissions. By examining microbial ecology of switchgrass influenced systems, researchers  
88 have revealed mechanistic understanding of the ways it enhances ecosystem services such as C  
89 sequestration, soil fertility, and GHG emissions (McLaughlin and Kszos, 2005; Ker et al., 2014;  
90 Clark et al., 2005; Bahulikar et al., 2014; Ghirmire et al., 2009; Kim et al., 2012; Ghimire and  
91 Craven, 2011). For instance, it was shown that N fertilization, at least at some sites, did not  
92 increase soil-surface carbon dioxide (CO<sub>2</sub>) emissions despite increases in above (Mulkey et al.,  
93 2006; Lee et al., 2007) and below ground biomass (Sher et al., 2020). However, the relative  
94 impact of methane (CH<sub>4</sub>) emissions during land conversions are not yet fully understood (Monti  
95 et al., 2012; Robertson and Grace, 2004; Fritsche et al., 2010). Additionally, the ecological  
96 consequences of land conversion, its impact on soil microbial ecology and functionality, as well  
97 as the overall sustainability of switchgrass cultivation as a biofuel crop remain to be  
98 demonstrated. Further, only a few studies have evaluated switchgrass cultivation at sites with  
99 low soil N, C, or P contents or in marginal lands that have experienced high rates of topsoil  
100 erosion (Gelfand et al., 2013; Ashiq et al., 2017). Particularly, we currently have a very limited  
101 understanding of how the transition from mixed annual grassland communities to switchgrass  
102 row-crop systems can affect (i) soil geochemical composition at nutrient-poor sites; (ii) soil

103 microbial biodiversity, and (iii) the overall prairie ecosystem functionality, specifically GHG  
104 fluxes.

105 In this study, we monitored the ecosystem-level effects of switchgrass establishment over  
106 two consecutive growing seasons (n = 17 months) in two nutrient-poor (relatively low N, P, and  
107 C contents) field sites in Southern Oklahoma (designated SL for the silt-loam soil texture and CL  
108 for the clay-loam soil texture). We compared switchgrass and natural fallow plots in terms of soil  
109 chemistry (C, N, and P), soil GHG fluxes (CO<sub>2</sub>, CH<sub>4</sub>, and N<sub>2</sub>O), and microbial community  
110 composition. We tested the hypotheses that annual mixed grassland conversion to switchgrass (i)  
111 increases topsoil C levels over time; (ii) switchgrass increases CO<sub>2</sub> respiration while maintaining  
112 similar CH<sub>4</sub> emission and N<sub>2</sub>O flux relative to annual mixed grassland communities (fallows);  
113 and (iii) switchgrass modifies the microbial community during establishment and decreases  
114 species richness over time. We expect shifts in microbial community composition to correlate  
115 with observed GHG fluxes. Our results indicated that switchgrass had a site-specific, with  
116 increased CO<sub>2</sub> respiration and decreases in microbial species richness observed only at the CL  
117 site, while soil C accumulation was observed only for the SL site. Switchgrass significantly  
118 reduced the methane consumption rates regardless of soil type.

## 119 **Methods**

### 120 **Field site, soil sampling, and root biomass estimation**

121 Samples were taken from two sites in southern Oklahoma, a silt-loam site (SL) near the  
122 Texas border (34.18691°N, -97.08487°W) and a clay-loam site (CL) in Ardmore (34.172100°N,  
123 -97.07953°W). Prior to our experiment, each field site had experienced annual crop rotation and  
124 periods of being left fallow. At each site, a switchgrass field plot (27 x 22 m) containing 500

125 genetically distinct individuals of the lowland Alamo variety with a 1 m spacing between plants  
126 and a corresponding fallow plot (27 x 22 m) were established in the summer of 2016 (Fig.  
127 S1a,b). All plots were tilled before planting switchgrass. Fallow plots were allowed to undergo  
128 natural succession of grasses and weeds over the time course of the experiment. To allow GHG  
129 measurements, at each plot, 21 PVC collars (diameter 23.63 cm x 12.8 cm x 1 cm) (Fig. S1c)  
130 were embedded 8 cm into the soil and placed in a cross design (Fig. S1a,b) with five collars  
131 extending in each cardinal direction from a central origin collar at the center of each plot. After  
132 trace gas measurement from each collar, two soil cores (15 - 20 cm in depth) were taken from  
133 within a 20 cm radius of each collar (Fig. S1d), thoroughly mixed, and separated into two bags,  
134 one for geochemical analyses and one for DNA extraction. Sampling flags were placed to  
135 prevent re-sampling the same location twice and each core was filled by topsoil taken from  
136 outside the plot. All soil samples were immediately stored on ice, transported back to the lab and  
137 kept at either 5°C for geochemical analyses or -80°C for DNA extraction. In May 2017, total  
138 belowground root biomass was estimated using the Fraiser et al., 2016 method. Briefly, four 0-1  
139 m cores were taken between six target plants and an adjacent plant (Fig. S2b). Soil cores were  
140 then divided into 5 depths for every 20 cm of soil. For each depth, roots were extracted from  
141 cores through sieving and soaking the soil in water. Roots from each layer of soil were collected,  
142 dried and massed from each layer. Switchgrass root biomass was estimated as described  
143 elsewhere (Frasier et al., 2016). For fallow plots, four randomly assigned 1 m<sup>2</sup> subplots within  
144 each of the quadrants were selected to take four 0-1 m soil cores to represent root biomass across  
145 the plot (Fig. S2c). No roots were detected from fallow soil cores below 60 cm depth.

#### 146 **Soil geochemistry, pH, and moisture**

147 Soil pH, moisture, total available C, N, P, nitrate (NO<sub>3</sub>), and ammonium (NH<sub>4</sub>) were  
148 measured following as described elsewhere (Hendershot et al., 2007). Briefly, 10 g of soil was  
149 placed into a 50 ml tube with distilled H<sub>2</sub>O added to the 50 ml fill line. Tubes were gently shaken  
150 for 30 minutes and given an hour to settle before pH measurement using a pH probe (Accumet  
151 excel XL15 pH meter, Fisher Scientific, Hampton NH, USA). Soil moisture was determined by a  
152 gravimetric drying protocol that dried > 5 g of soil for one week at > 60 °C before re-massing to  
153 establish the percent of water lost after drying. To determine other soil geochemical parameters,  
154 soil samples were dried in an oven at 60°C for a week followed by sieving to remove unwanted  
155 material with a 4 mm sieve. Soil samples were then shipped seasonally to the Oklahoma State  
156 University (OSU) soil testing lab where Mehlich III extractions (to quantify the available P in the  
157 soil), KCL extractions (to determine NH<sub>4</sub> and NO<sub>3</sub> concentrations) were performed and total soil  
158 C/N amounts were measured via dry combustion (LECO corporation, St. Joseph MI, USA).

### 159 **Environmental parameters**

160 Daily environmental data for 21 different environmental variables (at 5 to 15-minute  
161 resolution) were obtained from two weather monitoring stations (Ardmore and Burneyville)  
162 belonging to the Oklahoma MESONET network (<http://mesonet.org/>) that were the closest to our  
163 field sites (1.43 km and 2.3 km from SL and CL, respectively). Variables used included air  
164 temperature, bare soil temperature, covered soil temperature, atmospheric pressure, relative  
165 humidity, and precipitation (Table S1 and Table S2).

### 166 **Trace gas fluxes**

167 The CO<sub>2</sub>, CH<sub>4</sub>, and N<sub>2</sub>O fluxes were measured monthly via cavity ring-down  
168 spectrometry using a Picarro G2508 analyzer (Picarro, Santa Clara, CA, U.S.A.). Measurements

169 were taken continuously every 2 seconds from a total of 6 minutes per collar. This allowed us to  
170 obtain gas concentrations in parts per million. Raw data from each gas were separated and then  
171 manually inspected to remove the beginning and the end of the measurements, which are often  
172 influenced by the pushing/pulling of the gas chamber. Then three models (linear, quadratic, and  
173 exponential) were fitted for each sample and gas species to characterize the variation of gas  
174 concentrations across time and the ‘best model’ was selected based on AIC scores. Flux  
175 estimations for each of the gases were then calculated using the following equation (Christiansen  
176 et al., 2015):

$$177 \quad F = \frac{dC}{dt} \cdot \frac{PV}{A \cdot R(273.15+T)} \times 3600$$

178 Where  $\frac{dC}{dt}$  is the slope of the best fitted model at  $t = 0$ , V is the chamber volume (L), A is the  
179 chamber area ( $m^2$ ), R is the gas constant in  $L \text{ atm K}^{-1} \text{ mol}^{-1}$ , T is the temperature in Celsius, when  
180 the chamber pressure is assumed to be equal to 1 atm. The 3600 factor is included to convert the  
181 flux to hourly values. For  $CO_2$  flux, F was then divided by 1000 to obtain the correct units of  
182 millimoles per  $m^2$  per hour.

### 183 **Soil DNA extractions, microbial community sequencing and analysis**

184 A freeze grinding method (Zhou et al., 1996) was combined with the Powersoil DNA  
185 extraction kit (Qiagen, Venlo, Netherlands) to extract DNA from a total of 1,428 soil samples,  
186 which typically yielded soil DNA of both high quantity and quality. For microbial community  
187 profiling a two-step PCR method (Wu et al., 2015) was used for amplification of the V4 region  
188 of the bacterial 16S rRNA gene using the 515F, 5'-GTGCCAGCMGCCGCGGTAA-3' and  
189 806R, 5'-GGACTACHVGGGTWTCTAAT-3' primers. Sequencing of the 16S rRNA gene



190 amplicons was conducted on the Illumina Mi-Seq DNA sequencing platform (Illumina Inc., San  
191 Diego, CA, U.S.A.). Amplicon sequence data was analyzed using an internal pipeline known as  
192 the Amplicon Sequencing Analysis Pipeline (Zhang et al., 2014) (ASAP, version 1.4). MiSeq  
193 sequences were quality checked with FastQC (version 0.11.5), pair-end sequences were merged  
194 based on their 3' overlap using PEAR (version 0.9.10) with a quality score cutoff set to 20, and  
195 assembly length between 200-400 with the minimum overlap length set to 50 bp. The program  
196 *split\_libraries\_fastq.py* from the QIIME package (Kuczynski et al., 2012) (version 1.9.1) was  
197 used to assign reads to each sample (demultiplexing) based on the barcodes for each individual  
198 sample with a maximum allowed barcode error of 0 and the trimming quality score set to 20.  
199 Primer sequences were then trimmed and removed. Sequences from multiple split libraries were  
200 merged together. Dereplication was performed by USEARCH (Edgar, 2010) (version 9.2.64)  
201 using the command *fastx\_uniques* (utilizing the size-out option for sequence abundance output).  
202 Operational Taxonomic Units (OTUs) were clustered using UPARSE, with the OTU identity  
203 threshold set to 0.97 and the singletons/chimeric sequences removed (Edgar, 2013). The OTU  
204 table was generated by the command *-usearch\_global* in USEARCH. Each representative  
205 sequence for each OTU was classified with the RDP Classifier (Wang et al., 2007) (16S: training  
206 set 16, June 2016) with the confidence cutoff set to 0.8. OTUs in the 16S sequence reads  
207 assigned to Chloroplast at the Order level were removed. Representative sequences for each  
208 OTU were used to construct a phylogenetic tree. Sequences were then aligned using MAFFT  
209 (Kato, 2002) (version 3.8.31) and alignments were filtered using Gblocks (Castresana, 2000)  
210 (version 0.91b) with the options *-t=d*, *-b4=3* and *-b5=h*. FastTree (Price et al., 2009) was used for  
211 constructing the phylogenetic tree using the filtered alignments. The phylogenetic tree and OTU

212 tables were used to calculate alpha diversity (phylogenetic based indexes) and beta diversity  
213 (UniFrac distance) using programs packaged in QIIME (Caporaso et al., 2010) and R.

## 214 **Statistical analyses**

215 All analyses were conducted using R statistical software (3.4.4, R Core Team, 2014) and  
216 figures were produced using the package ggplot2 (Wickham, 2009). Data normality was tested  
217 using the Shapiro test. We tested for differences between plots in GHG flux and microbial alpha  
218 diversity by using linear mixed models to correct for repeated measurements (i.e. collars within  
219 plots) and to analyze the data over time (R package *lme4*, Bates et al., 2015). Pairwise  
220 comparisons for soil respiration between treatments were conducted using Wilcoxon Rank Sum  
221 test and effect sizes were calculated using Mann-Whitney U Test. Differences in soil  
222 biogeochemical properties between treatment were tested using Kruskal-Wallis test and effect  
223 size was calculated using epsilon squared. Soil geochemical dissimilarity was calculated from  
224 scaled data using Euclidean distances (*vegan* R package). Then mean dissimilarity across collars  
225 was used to construct linear mixed models to view changes in dissimilarity over time.  
226 Differences in microbial community structure across plot, site and time were tested using  
227 PERMANOVA test based on Bray Curtis and weighted-UniFrac dissimilarity for taxonomic and  
228 phylogenetic diversity, respectively. Differences in relative abundance between groups and time  
229 points was calculated by multiple Student T-Tests and p-values were adjusted by conservative  
230 Bonferroni correction to compensate for increased Type 1 errors over multiple time points.

231 Structural equation modeling (SEM) were used to explore the direct and indirect  
232 relationships among environmental variables and GHG fluxes (CO<sub>2</sub> and CH<sub>4</sub>) at either site. We  
233 first considered a full model that included all reasonable pathways, then eliminated  
234 nonsignificant pathways until we obtained a final model with only significant pathways. We used

235 a  $\chi^2$  test and the root mean square error (RMSE) to evaluate the fit of our model. The SEM-  
236 related analysis was performed using the lavaan R package (Rosseel, 2012).

## 237 **Results**

### 238 **Changes in soil geochemistry**

239 The conversion of grassland into switchgrass appeared to have a site-specific impact on  
240 soil geochemistry. A principal component analysis (PCA) of the soil geochemistry data revealed  
241 strong differences between the two sites (Figure 1). Heterogeneity of the geochemical parameters  
242 was higher at the CL site, as displayed by the dispersion of blue samples in Figure 1.

243 The total soil C at the SL site increased over the 17-month period in the switchgrass plot  
244 (Figure 2a) ( $r^2 = 0.12$ ,  $p < 0.001$ ) and was significantly higher than the fallow (Table 1,  $p <$   
245  $0.001$ , large effect size = 0.4). Switchgrass also had a homogenizing effect for soil C, reducing  
246 the overall dissimilarity between samples compared to the fallow plots, which had patchy plant  
247 cover. These increases in soil C were occurring evenly across the plots area (Fig. S3a). In  
248 contrast, the total soil C content remained constant in the CL switchgrass plot (Figure 2a).

249 Total soil N was significantly higher in the switchgrass plot at SL compared to the fallow  
250 plot (Table 1,  $p < 0.0001$ , medium effect size = 0.19) and these N levels significantly decreased  
251 over time ( $r^2 = 0.05$ ,  $p < 0.01$ ) (Figure 2b), coinciding with an increase in the soil N  
252 heterogeneity in the plot ( $r^2 = 0.12$ ,  $p < 0.0001$ ) (Fig. S3b). A significant increase in the total soil  
253 N was notable in the CL fallow plot ( $r^2 = 0.12$ ,  $p < 0.01$ ) (Figure 2b). Nitrate concentration was  
254 significantly reduced for the switchgrass treatment at the SL site (Table 1,  $p < 0.001$ , small effect  
255 size = 0.06). All sites and plots showed a significant reduction in  $\text{NO}_3$  concentrations over time

256 (Fig. S4) despite an increasing homogeneity (Fig. S3). No significant differences or trends were  
257 observed in  $\text{NH}_4$  concentrations during the length of our study at either site (Fig. S3e and S4b).

258 Total plant available P levels decreased over time in the SL site ( $r^2 = 0.05$ ,  $p < 0.01$ )  
259 (Figure 2c) and the P content homogenized across the plot (Fig. S3c) despite the SL switchgrass  
260 treatment having significantly higher total plant available P content compared to the fallow  
261 (Table 1,  $p < 0.0001$ , large effect size = 0.44). In the CL site, plant available P also decreased in  
262 the switchgrass plot compared to the fallow (Table 1,  $p < 0.001$ , medium effect size = 0.095, and  
263 Figure 2c).

#### 264 **Differences in estimated root biomass**

265 Field-scale estimates of belowground root biomass (Fig. S2a) showed a large difference in  
266 the root biomass between each switchgrass plot and the corresponding fallow (17.8 and 64 times  
267 higher for SL and CL, respectively). Root biomass was estimated for each soil layer in  
268 kilograms per meter squared and compared to switchgrass estimates. Estimated total root  
269 biomass of the switchgrass plots was  $16.9 \text{ kg/m}^2$  for the SL site and  $14.1 \text{ kg/m}^2$  for the CL site,  
270 while the fallows were  $0.95 \text{ kg/m}^2$  for SL and  $0.22 \text{ kg/m}^2$  for CL. Generally, root biomass  
271 decreased along the soil depth profile for both sites. SL switchgrass site had increased root  
272 biomass estimates at lower depths (60-100 cm) than the CL site, which contributed to a slightly  
273 higher total root biomass.

#### 274 **Greenhouse gas (GHG) fluxes at the soil-atmosphere interface**

275  $\text{CO}_2$  flux at both sites exhibited a similar seasonal trend with the apex of emissions occurring  
276 during summer months and the minimum in late Fall/early Winter months. At the SL site,  
277 switchgrass treatment led to significantly higher total  $\text{CO}_2$  flux for 29% of the months after

278 switchgrass planting (Wilcoxon  $p < 0.001$ , Figure 3a) while the fallow was significantly higher  
279 for only 24% of the total months measured. The average  $\text{CO}_2$  flux over the 17-months did not  
280 differ in the SL site between switchgrass ( $6.76 \pm 5.23$  millimoles $\cdot\text{m}^2\cdot\text{hour}^{-1}$ ) and the fallow ( $6.87$   
281  $\pm 5.87$  millimoles $\cdot\text{m}^2\cdot\text{hour}^{-1}$ ) (Figure 3d). At the CL site, there was a significant difference  
282 between treatments (Figure 3d) in the average  $\text{CO}_2$  flux over the 17-month period ( $p < 0.001$ )  
283 with the switchgrass plot at  $9.98 \pm 6.04$  millimoles $\cdot\text{m}^2\cdot\text{hour}^{-1}$  and the fallow at  $9.22 \pm 6.62$   
284 millimoles $\cdot\text{m}^2\cdot\text{hour}^{-1}$ , although the effect size was small (0.13). When comparing the two sites,  
285 CL exhibited significantly higher total soil  $\text{CO}_2$  fluxes for both switchgrass and fallow plots than  
286 those measured at SL (Wilcoxon  $p < 0.001$ ).

287  $\text{CH}_4$  flux (Figure 3b, Table S3) differed significantly between switchgrass and fallow  
288 (Wilcoxon  $p < 0.001$ , small effect size = 0.15), with a tendency toward higher  $\text{CH}_4$  emissions or  
289 lower  $\text{CH}_4$  consumption levels in the switchgrass plot observed for 41% of the months (Figure  
290 3b) after switchgrass was planted (41% and 52% for CL and SL, respectively).  $\text{CH}_4$  flux in the  
291 fallow was higher only at one time point (14<sup>th</sup> month after switchgrass establishment). Overall,  
292 the 17-month average  $\text{CH}_4$  consumption rate was  $-0.44 \pm 1.07$  micromoles $\cdot\text{m}^2\cdot\text{hour}^{-1}$  for  
293 switchgrass treatments ( $-0.46 \pm 1.08$  and  $-0.41 \pm 1.06$  micromoles $\cdot\text{m}^2\cdot\text{hour}^{-1}$  for CL and SL,  
294 respectively) while it reached  $-0.77 \pm 1.15$  in the fallow ( $-0.76 \pm 1.78$  and  $-0.77 \pm 0.53$  and  
295 micromoles $\cdot\text{m}^2\cdot\text{hour}^{-1}$  for CL and SL, respectively) (Figure 3e, Table S3). Together, a significant  
296 ( $p < 0.05$ , a small effect size = 0.14) switchgrass treatment effect on reducing  $\text{CH}_4$  consumption  
297 rates was observed at both sites. No significant differences were found for  $\text{N}_2\text{O}$  flux between the  
298 switchgrass ( $-0.26 \pm 2.55$  micromoles $\cdot\text{m}^2\cdot\text{hour}^{-1}$  at CL and  $-2.88 \pm 2.09$  micromoles $\cdot\text{m}^2\cdot\text{hour}^{-1}$  at  
299 SL) and fallow plots ( $-1.65 \pm 2.5$  micromoles per  $\text{m}^2$  per hour at CL and  $-5.01 \pm 2.16$  micromoles

300 per m<sup>2</sup> per hour at SL) at either site (Figure 3c, Table S3) over the 17-months of observations  
301 (Figure 3f).

### 302 **Microbial community dynamics**

303 Microbial alpha diversity, calculated as the OTU richness, responded in a site-specific  
304 manner to switchgrass cultivation. In the SL site, OTU richness was significantly higher in the  
305 switchgrass plot (Table S3,  $p < 0.0001$ , Medium effect size = 0.38). OTU richness did not  
306 change over time in the SL switchgrass plot (Figure 4a) but increased in the fallow plot ( $p <$   
307  $0.001$ ), despite a decrease in phylogenetic diversity (PD) ( $p < 0.05$ , Figure 4a,b). At the CL site,  
308 species richness decreased significantly over time in both switchgrass ( $p < 0.01$ ) and fallow plots  
309 ( $p < 0.001$ ). For PD, this decay was observed only in the switchgrass plot ( $p < 0.01$ ). Chao1 and  
310 Shannon index showed similar trends per site over time (Fig. S5).

311 We observed significant differences in the bacterial community structure (beta diversity)  
312 between sites, plant cover type, and over time (Figure 4c, PERMANOVA,  $p < 0.01$ , Table S4).  
313 Relative abundance of major phyla showed large changes from the initial planting/before soil  
314 tillage and two months after the experiment began (Figure 5). At all sites, at least five abundant  
315 phyla exhibited changes in relative abundance. Firmicutes phyla relative abundance (0.6 – 0.14  
316 %) changed over the course of the experiment in both fallow plots. The structure of microbial  
317 communities from the switchgrass plots appeared less variable than their corresponding fallows.  
318 In the CL site, the strongest differences in dominant phyla relative abundance between plots  
319 (switchgrass vs fallow) were observed at eight and fourteen months after switchgrass planting  
320 (Feb. 2017 and Aug. 2017, Table S5). After eight months, seven phyla (Actinobacteria,  
321 Bacteroidetes, Chloroflexi, Deinococcus-Thermus, Firmicutes, Plactomycetes, and  
322 Verrucomicrobia) exhibited different abundance between treatment, while only four phyla

323 (Actinobacteria, Chloroflexi, Cyanobacteria, and Deinococcus-Thermus) were different after  
324 fourteen months. For the SL site, the largest shifts in community composition occurred in the last  
325 two time points, *i.e.* fourteen and sixteen months after switchgrass establishment. After fourteen  
326 months, three phyla were significantly different between treatment (Acidobacteria, Bacteroidetes  
327 and Deinococcus-Thermus) and after sixteen months four groups were significantly different  
328 (Acidobacteria, Bacteroidetes, Cyanobacteria, and Verrucomicrobia).

329 Canonical correspondence analysis (CCA) was used to link environmental variables to the  
330 microbial community (Figure 6). A clear separation between microbial communities from the  
331 two sites was observed. Microbial communities from the SL site were correlated with plant  
332 available P and soil pH, while CL communities were associated with total soil N, NH<sub>4</sub>, and NO<sub>3</sub>.  
333 In addition, fallow communities from CL were dispersed, while switchgrass communities at this  
334 site were clustered by N source or along a soil moisture profile.

### 335 **Structural equation model**

336 Structural equation modeling (SEM) was used for an in-depth analysis of the direct and  
337 indirect effects of the environmental drivers on CO<sub>2</sub> and CH<sub>4</sub> flux for both sites. Correlations  
338 between all variables are shown in the correlogram Figure S6. For CO<sub>2</sub> fluxes (Figure 7a) the  
339 model confirmed the importance of the site effect on soil geochemistry and microbial  
340 communities, with the strongest direct effects (based on standardized coefficient) being directed  
341 from the site towards total C ( $\beta = -0.95$ ,  $p < 0.001$ ), total N ( $\beta = -0.94$ ,  $p < 0.001$ ), P levels ( $\beta =$   
342  $0.88$ ,  $p < 0.001$ ), and microbial alpha diversity ( $\beta = 0.52$ ,  $p < 0.001$ ). Plant available P tended to  
343 influence the levels of C and N in the system, and these three components of soil have significant  
344 effects on CO<sub>2</sub> fluxes. Other important variables influencing CO<sub>2</sub> fluxes included soil  
345 temperature ( $\beta = 0.69$ ,  $p < 0.001$ ), moisture ( $\beta = 0.27$ ,  $p < 0.001$ ) and microbial biomass ( $\beta = -$

346 0.18,  $p < 0.001$ ). This later variable appeared mostly dependent on N content ( $\beta = 0.56$ ,  $p <$   
347 0.001).

348 In the CH<sub>4</sub> model (Figure 7b), which was focused on the switchgrass plots, the site effect  
349 appeared less pronounced and mostly directed toward P levels ( $\beta = -0.29$ ,  $p < 0.001$ ) and  
350 microbial alpha diversity ( $\beta = 0.62$ ,  $p < 0.001$ ). Although soil temperature did not have a very  
351 strong influence on CH<sub>4</sub> fluxes ( $\beta = -0.19$ ,  $p < 0.001$ ), it was still important in this model through  
352 many direct effects on P ( $\beta = 0.07$ ,  $p < 0.001$ ), NO<sub>3</sub> ( $\beta = 0.23$ ,  $p < 0.001$ ), pH ( $\beta = -0.22$ ,  $p <$   
353 0.001), microbial diversity ( $\beta = 0.11$ ,  $p < 0.001$ ), and moisture ( $\beta = -0.39$ ,  $p < 0.001$ ). Overall, we  
354 were able to show that CH<sub>4</sub> fluxes depended on a combination of soil chemical properties (P and  
355 NO<sub>3</sub>) along with physical (temperature and moisture) and biological (microbial diversity)  
356 characteristics.

## 357 **Discussion**

358 Our study illustrates that soil type is a key component of switchgrass' ability to improve soil  
359 quality and appears crucial for its use as a sustainable bioenergy feedstock. It was hypothesized  
360 that switchgrass would increase (i) topsoil C levels and (ii) increased CO<sub>2</sub> respiration -with (iii)  
361 little effect on CH<sub>4</sub> emissions and N<sub>2</sub>O flux, but also (iv) decreased the bulk soil microbial  
362 species richness relative to annual mixed grassland communities. While C accrual, CO<sub>2</sub>  
363 respiration, and microbial richness reductions were site-dependent in our study, switchgrass  
364 significantly altered the soil CH<sub>4</sub> sink capacity at both sites by reducing the overall CH<sub>4</sub>  
365 consumption rates. Although the CH<sub>4</sub> emission rates reported here were expectedly lower than  
366 those reported for natural systems with anaerobic, water-logged conditions like peatlands (Dise,  
367 1993) and wetlands (Bridgman et al., 2013; Bartlett and Harriss, 1993), our findings challenged



368 the notion that CH<sub>4</sub> emissions has negligible effects on GHG budgets during marginal land  
369 transitions to switchgrass row-cropping (Monti et al., 2012). However, comprehensive GHG  
370 budgets along with spatial-explicit modeling of soil and plant C stocks should be considered to  
371 fully evaluate the net effect of land type conversion at these prairie sites.

### 372 **Soil type dictates the effects that switchgrass has on geochemistry**

373 Our study revealed significant site-level differences to switchgrass establishment on soil C  
374 accrual, total soil N levels and depletion of soil P content. The CL site with higher relative  
375 nutrient content showed little change over time (17 months) for any of the soil geochemical  
376 parameters. Ma et al., 2000 reported changes in soil geochemistry by switchgrass cultivation in  
377 clay-loam soils were only detected after longer periods of time (over a decade). Therefore,  
378 prolonged sampling at our CL site will improve assessments of switchgrass-induced soil C  
379 changes. Nitrate contents (Figure S4a) significantly declined with time, which may suggest  
380 assimilation by the switchgrass or an increased activity of denitrifying bacteria. It is also notable  
381 that the crop was grown under natural conditions without applying any chemical fertilizers.

382 The SL site showed significant increases in soil C content for the top-soil layer (27% higher  
383 total C after two growing seasons) over the course of switchgrass establishment. This is  
384 consistent with estimates of switchgrass systems repaying their C debt in a relatively short  
385 amount of time (Abrah et al., 2019). However, switchgrass led to significant depletions in soil N  
386 and P contents at the SL site over time, though these values were higher than the fallow from the  
387 beginning of our experiment. One explanation for this observation is the increased below ground  
388 root biomass estimates being larger for the SL site at lower depths. Greater investment of  
389 belowground root biomass may reflect the higher plant available P conditions at this site,

390 allowing switchgrass to extend deeper into the subsurface soil for water or micronutrient  
391 availability.

392 Seasonal sampling of  $\text{NH}_4\text{-N}$  sources was not sufficient in explaining large seasonal  
393 variations observed over the time course of our experiment. For example, a spike in soil  $\text{NH}_4$   
394 levels (Figure S4b) was detected during October of 2016 and June of 2017, which could be the  
395 signature of episodic N fixation events occurring in switchgrass during/before flowering as  
396 reported previously (Roley et al., 2019). However, our resolution in sampling this geochemical  
397 parameter is not sizeable enough to adequately explain these anomalies.

### 398 **Microbial community shifts under switchgrass establishment**

399 Microbial community diversity and composition at each site had differential responses to  
400 switchgrass establishment. Broadly, alpha diversity measures in CL decreased over time and  
401 revealed a higher amount of clustering and similarity in the overall community structure  
402 compared with the fallow. Analogous to secondary plant successional dynamics, the microbial  
403 community at the CL site may be more influenced by the change from short rooted annuals to the  
404 monoculture of deep-rooted perennial switchgrass, causing a loss in microbial diversity (Cline  
405 and Zak, 2015). For SL, switchgrass cultivation significantly increased the Shannon index over  
406 time and caused the community composition to shift away from the fallow. This may be  
407 indicative of the improvements of soil quality, which changed the functionality of the microbial  
408 community due to the influence of switchgrass on increases in soil C levels (Leff et al., 2015).

409 Microbial community structure was altered by switchgrass establishment (Table S4) and  
410 through time at each of the sites relative to the fallow soil communities. These changes in  
411 community structure may reflect different survival strategies that switchgrass may employ in the

412 recruitment of specific taxa to its rhizosphere based of differences between the geochemistry of  
413 the two sites. Investigations into rhizosphere microbiome succession during establishment may  
414 provide insights into direct plant-microbe interactions that facilitate switchgrass establishment in  
415 these nutrient-poor soils.

#### 416 **Factors controlling soil GHG flux**

417 Contrary to our hypothesis, CO<sub>2</sub> respiration was significantly enhanced by switchgrass  
418 establishment only at the CL site. We expected higher root respiration and the potential for deep  
419 C mineralization to enhance soil respiration at both sites after switchgrass establishment  
420 (Shahzad et al., 2018; Fontaine et al., 2007). The CL site had an overall higher total CO<sub>2</sub>  
421 emission rate during our field monitoring. This response may be mediated by the relatively  
422 higher preexisting C nutrient conditions found at this clay-loam site (Kang et al., 2016) as root  
423 biomass levels were estimated to be similar at each site. This illustrates a benefit in site selection  
424 by soil type in minimizing CO<sub>2</sub> released during land conversion.

425 Nitrous oxide fluxes did not show any significant effect between either site or plant cover  
426 type. Thus, we did not see an effect of switchgrass or site on nitrous oxide fluxes. However,  
427 nitrous oxide fluxes were marked by high variability, both seasonally and spatially within each  
428 plot. Efforts were made to correlate rainfall events to reduce noise in the flux signal, but a  
429 substantial limitation was our six-minute window of continuous measurements per sampling  
430 event. A longer period of trace gas sampling may have resulted in a more stable signal with less  
431 variability for nitrous oxide fluxes.

432 Methane flux monitoring showed a significant reduction in CH<sub>4</sub> consumptions at both  
433 sites with switchgrass introduction and cultivation. Although CH<sub>4</sub> emission rates were low and

434 measured at only a few time points, consistently lower CH<sub>4</sub> consumption rates were observed  
435 throughout the monitoring period of our experiment. Total methane consumption rates for  
436 switchgrass plots were reduced by 47% and 39% compared to corresponding fallow sites for CL  
437 and SL, respectively. This could reflect considerable differences in the net C budget and fluxes  
438 for these switchgrass sites. In the future, GeoChip-based functional microarray (Shi et al., 2019)  
439 as well as, RT-qPCR of CH<sub>4</sub> monooxygenase and methyl-coenzyme M reductase genes may help  
440 provide us with specific linkages between microbial functionality potential and our reported CH<sub>4</sub>  
441 emissions at key time points during our experimental monitoring.

## 442 **Conclusion**

443 Overall, soil C levels increased by 27% during the 17 months experiment in the site with the  
444 lowest nutrient content (silt loam, SL) while they remained consistent in the clay loam (CL) site.  
445 Switchgrass significantly affected total CO<sub>2</sub> respiration at the CL site, but not at the SL site  
446 compared to the annual mixed grassland community fallows and showed a difference in the site  
447 level emissions. Grassland conversion to switchgrass reduced the annual CH<sub>4</sub> consumption by 39  
448 to 47%, implying that methane fluxes should be accounted for in C budgets to reach a  
449 sustainable cultivation of switchgrass. Switchgrass establishment had a significant influence on  
450 the microbial community composition over time. Our SEM analysis indicated that soil  
451 temperature and moisture were strong environmental drivers of the soil the CO<sub>2</sub> and CH<sub>4</sub> flux at  
452 each site. Considerations on soil type and nutrient conditions should be made for the selection of  
453 future sites suitable for large-scale bioenergy cultivation of that meets objectives for terrestrial C  
454 sequestration and improved soil fertility.

455

## 456 **Acknowledgements**

457 We would like to thank the Oklahoma Mesonet environmental monitoring network, and  
458 particularly Bradley Ilston, for the use of their weather monitoring stations for this work. We  
459 deeply appreciate all the help from the auxiliary staff and field hands from the Nobel Research  
460 Institute, who aided in us in collecting data and maintaining the field sites for this project. A.  
461 Escalas and C. Bates would like to give a special thanks to Randy Freeman, who helped a lot for  
462 making sample collection and processing possible. We would also like to thank the following for  
463 their contributions in field sampling and molecular work: Zhigang Wang, Yuguang Zhang, Ning  
464 Hu, Yan He, Zhongfang Li, Qian Li, Jinyu Hou, Xiubin Ke, Juan Ling, Zheng Gao, and Daniel  
465 Curtis. C. Bates would also like to thank Cheryl Bates for edits and Tanya Ball for support  
466 during this project. This research is supported by the U.S. Department of Energy Office of  
467 Science, Office of Biological and Environmental Research Genomic Science program under the  
468 award number DE-SC0014079 to the UC Berkeley, Nobel Research Institute, University of  
469 Oklahoma, the Lawrence Livermore National Laboratory, and the Lawrence Berkeley National  
470 Laboratory.

471

472

## 473 **References**

- 474 1. Abraha M, Gelfand I, Hamilton SK, Chen J, Robertson GP. Carbon debt of field-scale  
475 conservation reserve program grasslands converted to annual and perennial bioenergy  
476 crops. *Environ Res Lett*. 2019;
- 477 2. Anderson-Teixeria KJ, Davis SC, Masters MD, Delucia EH. Changes in soil organic  
478 carbon under biofuel crops. *GCB Bioenergy*. 2009;
- 479 3. Ashiq MW, Bazrgar AB, Fei H, Coleman B, Vessey K, Gordon A, et al. A nutrient-based  
480 sustainability assessment of purpose-grown poplar and switchgrass biomass production  
481 systems established on marginal lands in Canada. *Can J Plant Sci*. 2017;
- 482 4. Bahulikar RA, Torres-Jerez I, Worley E, Craven K, Udvardi MK. Diversity of nitrogen-  
483 fixing bacteria associated with switchgrass in the native tallgrass prairie of Northern  
484 Oklahoma. *Appl Environ Microbiol*. 2014;
- 485 5. Barney JN, Mann JJ, Kyser GB, Blumwald E, Van Deynze A, DiTomaso JM. Tolerance  
486 of switchgrass to extreme soil moisture stress: Ecological implications. *Plant Sci*. 2009;
- 487 6. Bartlett KB, Harriss RC. Review and assessment of methane emissions from wetlands.  
488 *Chemosphere*. 1993;
- 489 7. Bates D, Mächler M, Bolker BM, Walker SC. Fitting linear mixed-effects models using  
490 lme4. *J Stat Softw*. 2015;
- 491 8. Baumhardt LR. Dust Bowl Era. In: *Encyclopedia of Water Science*. 2003.
- 492 9. Bouton JH. Molecular breeding of switchgrass for use as a biofuel crop. *Current Opinion*  
493 *in Genetics and Development*. 2007;
- 494 10. Bouton, J. in *Genetic Improvement of Bioenergy Crops* (ed W. Vermerris) 295-308  
495 Springer Science and Business Media, 2008;

- 496 11. Bridgham SD, Cadillo-Quiroz H, Keller JK, Zhuang Q. Methane emissions from  
497 wetlands: Biogeochemical, microbial, and modeling perspectives from local to global  
498 scales. *Glob Chang Biol.* 2013;
- 499 12. Caporaso JG, Kuczynski J, Stombaugh J, Bittinger K, Bushman FD, Costello EK, et al.  
500 QIIME allows analysis of high-throughput community sequencing data. *Nature Methods.*  
501 2010;
- 502 13. Castresana J. Selection of conserved blocks from multiple alignments for their use in  
503 phylogenetic analysis. *Mol Biol Evol.* 2000;
- 504 14. Christiansen JR, Outhwaite J, Smukler SM. Comparison of CO<sub>2</sub>, CH<sub>4</sub> and N<sub>2</sub>O soil-  
505 atmosphere exchange measured in static chambers with cavity ring-down spectroscopy  
506 and gas chromatography. *Agric For Meteorol.* 2015;
- 507 15. Clark RB, Baligar VC, Zobel RW. Response of mycorrhizal switchgrass to phosphorus  
508 fractions in acidic soil. *Commun Soil Sci Plant Anal.* 2005;
- 509 16. Cline LC, Zak DR. Soil microbial communities are shaped by plant-driven changes in  
510 resource availability during secondary succession. *Ecology.* 2015;
- 511 17. Dabney SM, Shields FD, Temple DM, Langendoen EJ. Erosion processes in gullies  
512 modified by establishing grass hedges. *Trans Am Soc Agric Eng.* 2004;
- 513 18. Dise NB. Methane emission from Minnesota peatlands: Spatial and seasonal variability.  
514 *Global Biogeochem Cycles.* 1993;
- 515 19. Edgar RC. Search and clustering orders of magnitude faster than BLAST. *Bioinformatics.*  
516 2010;
- 517 20. Edgar RC. UPARSE: Highly accurate OTU sequences from microbial amplicon reads.  
518 *Nat Methods.* 2013;

- 519 21. Fontaine S, Barot S, Barré P, Bdioui N, Mary B, Rumpel C. Stability of organic carbon in  
520 deep soil layers controlled by fresh carbon supply. *Nature*. 2007;
- 521 22. Frank AB, Berdahl JD, Hanson JD, Liebig MA, Johnson HA. Biomass and carbon  
522 partitioning in switchgrass. *Crop Sci*. 2004;
- 523 23. Frasier I, Noellemeyer E, Fernández R, Quiroga A. Direct field method for root biomass  
524 quantification in agroecosystems. *MethodsX*. 2016;
- 525 24. Fritsche UR, Sims REH, Monti A. Direct and indirect land-use competition issues for  
526 energy crops and their sustainable production - an overview. *Biofuels, Bioproducts and  
527 Biorefining*. 2010;
- 528 25. Gelfand I, Sahajpal R, Zhang X, Izaurralde RC, Gross KL, Robertson GP. Sustainable  
529 bioenergy production from marginal lands in the US Midwest. *Nature*. 2013;
- 530 26. Ghimire SR, Charlton ND, Craven KD. The mycorrhizal fungus, *sebacina vermifera*,  
531 enhances seed germination and biomass production in switchgrass (*panicum virgatum* l).  
532 *Bioenergy Res*. 2009;
- 533 27. Ghimire SR, Craven KD. Enhancement of Switchgrass (*Panicum virgatum* L.) Biomass  
534 Production under Drought Conditions by the Ectomycorrhizal Fungus *Sebacina  
535 vermifera*. *Appl Environ Microbiol*. 2011;
- 536 28. Hartman JC, Nippert JB, Orozco RA, Springer CJ. Potential ecological impacts of  
537 switchgrass (*Panicum virgatum* L.) biofuel cultivation in the Central Great Plains, USA.  
538 *Biomass and Bioenergy*. 2011;
- 539 29. Hendershot W, Lalonde H, Duquette M. Soil Reaction and Exchangeable Acidity. In: *Soil  
540 Sampling and Methods of Analysis, Second Edition*. 2007;



- 541 30. Jobbágy EG, Jackson RB. The distribution of soil nutrients with depth: Global patterns  
542 and the imprint of plants. *Biogeochemistry*. 2001;
- 543 31. Kang H, Fahey TJ, Bae K, Fisk M, Sherman RE, Yanai RD, et al. Response of forest soil  
544 respiration to nutrient addition depends on site fertility. *Biogeochemistry*. 2016;
- 545 32. Katoh K. MAFFT: a novel method for rapid multiple sequence alignment based on fast  
546 Fourier transform. *Nucleic Acids Res*. 2002;
- 547 33. Ker K, Seguin P, Driscoll BT, Fyles JW, Smith DL. Evidence for enhanced N availability  
548 during switchgrass establishment and seeding year production following inoculation with  
549 rhizosphere endophytes. *Arch Agron Soil Sci*. 2014;
- 550 34. Kim S, Lowman S, Hou G, Nowak J, Flinn B, Mei C. Growth promotion and  
551 colonization of switchgrass (*Panicum virgatum*) cv. alamo by bacterial endophyte  
552 *Burkholderia phytofirmans* strain PsJN. *Biotechnol Biofuels*. 2012;
- 553 35. Kuczynski J, Stombaugh J, Walters WA, González A, Caporaso JG, Knight R. Using  
554 QIIME to analyze 16s rRNA gene sequences from microbial communities. *Curr Protoc*  
555 *Microbiol*. 2012;
- 556 36. Lee DK, Doolittle JJ, Owens VN. Soil carbon dioxide fluxes in established switchgrass  
557 land managed for biomass production. *Soil Biol Biochem*. 2007;
- 558 37. Leff JW, Jones SE, Prober SM, Barberán A, Borer ET, Firen JL, et al. Consistent  
559 responses of soil microbial communities to elevated nutrient inputs in grasslands across  
560 the globe. *Proc Natl Acad Sci U S A*. 2015;
- 561 38. Liang C, Jesus E da C, Duncan DS, Quensen JF, Jackson RD, Balser TC, et al.  
562 Switchgrass rhizospheres stimulate microbial biomass but deplete microbial necromass in  
563 agricultural soils of the upper Midwest, USA. *Soil Biol Biochem*. 2016;

- 564 39. Liebig MA, Schmer MR, Vogel KP, Mitchell RB. Soil Carbon Storage by Switchgrass  
565 Grown for Bioenergy. *BioEnergy Res.* 2008;
- 566 40. Ma Z, Wood CW, Bransby DI. Soil management impacts on soil carbon sequestration by  
567 switchgrass. *Biomass and Bioenergy.* 2000;
- 568 41. McLaughlin SB, Kszos LA. Development of switchgrass (*Panicum virgatum*) as a  
569 bioenergy feedstock in the United States. *Biomass and Bioenergy.* 2005;
- 570 42. Milbrandt AR, Heimiller DM, Perry AD, Field CB. Renewable energy potential on  
571 marginal lands in the United States. *Renewable and Sustainable Energy Reviews.* 2014;
- 572 43. Monti A, Barbanti L, Zatta A, Zegada-Lizarazu W. The contribution of switchgrass in  
573 reducing GHG emissions. *GCB Bioenergy.* 2012.
- 574 44. Mulkey VR, Owens VN, Lee DK. Management of switchgrass-dominated conservation  
575 reserve program lands for biomass production in South Dakota. *Crop Sci.* 2006;
- 576 45. Price MN, Dehal PS, Arkin AP. Fasttree: Computing large minimum evolution trees with  
577 profiles instead of a distance matrix. *Mol Biol Evol.* 2009;
- 578 46. Robertson GP, Grace PR. Greenhouse gas fluxes in tropical and temperate agriculture:  
579 The need for a full-cost accounting of global warming potentials. *Environ Dev Sustain.*  
580 2004;
- 581 47. R Core Team. R Core Team (2014). R: A language and environment for statistical  
582 computing. R Found Stat Comput Vienna, Austria URL [http://wwwR-project.org/](http://www.R-project.org/). 2014;
- 583 48. Roley SS, Xue C, Hamilton SK, Tiedje JM, Robertson GP. Isotopic evidence for episodic  
584 nitrogen fixation in switchgrass (*Panicum virgatum* L.). *Soil Biol Biochem.* 2019;
- 585 49. Rosseel Y. Lavaan: An R package for structural equation modeling. *J Stat Softw.* 2012;

- 586 50. Schubert SD, Suarez MJ, Pegion PJ, Koster RD, Bacmeister JT. On the Cause of the  
587 1930s Dust Bowl. *Science* (80- ). 2004;
- 588 51. Shahzad T, Rashid MI, Maire V, Barot S, Perveen N, Alvarez G, et al. Root penetration  
589 in deep soil layers stimulates mineralization of millennia-old organic carbon. *Soil Biol*  
590 *Biochem.* 2018;
- 591 52. Sher Y, Baker NR, Herman D, Fossum C, Hale L, Zhang X, et al. Microbial extracellular  
592 polysaccharide production and aggregate stability controlled by switchgrass (*Panicum*  
593 *virgatum*) root biomass and soil water potential. *Soil Biol Biochem.* 2020;
- 594 53. Shi Z, Yin H, Van Nostrand JD, Voordeckers JW, Tu Q, Deng Y, et al. Functional Gene  
595 Array-Based Ultrasensitive and Quantitative Detection of Microbial Populations in  
596 Complex Communities. *mSystems.* 2019;
- 597 54. Stoof CR, Richards BK, Woodbury PB, Fabio ES, Brumbach AR, Cherney J, et al.  
598 Untapped Potential: Opportunities and Challenges for Sustainable Bioenergy Production  
599 from Marginal Lands in the Northeast USA. *Bioenergy Research.* 2015;
- 600 55. Tiemann LK, Grandy AS. Mechanisms of soil carbon accrual and storage in bioenergy  
601 cropping systems. *GCB Bioenergy.* 2015;
- 602 56. Tilman D, Hill J, Lehman C. Carbon-negative biofuels from low-input high-diversity  
603 grassland biomass. *Science* (80- ). 2006;
- 604 57. Wang Q, Garrity GM, Tiedje JM, Cole JR. Naïve Bayesian classifier for rapid  
605 assignment of rRNA sequences into the new bacterial taxonomy. *Appl Environ*  
606 *Microbiol.* 2007;
- 607 58. Wickham H. *ggplot2: elegant graphics for data analysis.* Springer New York. 2009;

- 608 59. Worster D. Dust bowl: the Southern Plains in the 1930s ( Oklahoma and Kansas). Dust  
609 bowl South Plains 1930s (Oklahoma Kansas). 1982;
- 610 60. Wu L, Wen C, Qin Y, Yin H, Tu Q, Van Nostrand JD, et al. Phasing amplicon  
611 sequencing on Illumina Miseq for robust environmental microbial community analysis.  
612 BMC Microbiol. 2015;
- 613 61. Zan CS, Fyles JW, Girouard P, Samson RA. Carbon sequestration in perennial bioenergy,  
614 annual corn and uncultivated systems in southern Quebec. Agric Ecosyst Environ. 2001;
- 615 62. Zhang J, Kobert K, Flouri T, Stamatakis A. PEAR: A fast and accurate Illumina Paired-  
616 End reAd mergeR. Bioinformatics. 2014;
- 617 63. Zhou J, Bruns MA, Tiedje JM. DNA recovery from soils of diverse composition. Appl  
618 Environ Microbiol. 1996;

619

## 620 **Table and Figure Captions**

621 **Table 1: Differences in physico-chemical soil properties for each site and treatment**  
622 **after 17-months.** Values are mean  $\pm$  SD values and significance was tested  
623 by Kruskal-Wallis rank sum test.

624 **Figure 1. Differences in soil geochemical properties between the two studied sites.**  
625 Principal component analysis. Blue colors represent the CL site while red/orange colors  
626 signify the SL site. Dark colors represent the SG samples. Variation contained in each PC  
627 axis are displayed next to each axis.

628 **Figure 2. Changes in soil chemistry through two seasons of switchgrass**  
629 **establishment. a,** Total soil carbon percentages; **b,** Total soil nitrogen percentages; **c,**

630 Concentration of plant available phosphate content in parts per million. The best linear  
631 model describing the relationship is presented.  $W_s$ : estimated model slope and associated  
632 error. p-values represent the significance of each model. Each time point is comprised of  
633 twenty-one replicates per plot.

634 **Figure 3. Greenhouse gas (GHG) fluxes during grassland conversion to switchgrass.**  
635 **a, b, c:** GHG fluxes at each site over 17 months (mean and standard error estimated using  
636 21 replicates for each time points) for: **a**, carbon dioxide flux; **b**, methane flux; **c**, nitrous  
637 oxide. **d**, Average GHG fluxes over 17-months for: **d**, carbon dioxide; **e**, methane flux; **f**,  
638 nitrous oxide flux. Different letters and asterisk indicate significant difference between  
639 groups by Wilcox sign test with p-value < 0.01.

640 **Figure 4. Changes in microbial diversity and structure in response to switchgrass**  
641 **planting.** **a**, Number of observed species through time; **b**, Phylogenetic diversity. **c**,  
642 Detrended correspondence analysis of the 16S community separated by site for all time  
643 points and plots. Significant differences were found between sites, plant cover types, and  
644 through time (PERMANOVA,  $p < 0.01$ ). Dark colors represent the switchgrass samples.

645 **Figure 5. Changes of relative abundance for major phyla.** Taxonomic identity was  
646 determined with the RDP classifier at 80% sequence match criteria. OTU table was  
647 trimmed by abundant OTUs (> 0.001%). Difference between time points within each plot  
648 for: **a**, Clay-loam switchgrass (CL-SG) plot; **b**, Clay-loam fallow (CL-FL) plot; Silt-loam  
649 switchgrass (SL-SG) plot; Silt-loam fallow (SL-FL) plot. Significant differences between  
650 the pervious time point for each group denoted by asterisk (\*) symbols within each phyla  
651 bar.

652 **Figure 6. Relationships between environmental factors and microbial communities**  
653 **structure.** Canonical correspondence analysis (CCA) linking microbial communities  
654 structure with environmental variables. Samples are shown by plot and site type with  
655 significant environmental variables shown in black arrows.

656 **Figure 7. Structural equation modeling showing the relationships among**  
657 **environmental variables and GHG fluxes. a:** Model for total carbon dioxide flux  
658 generated from the seasonal data ( $\chi^2 = 25.806$ , d.f. = 18,  $P = 0.104$ ,  $n = 588$ ). **b:** Model  
659 for methane flux generated from seasonal data of switchgrass plots only ( $\chi^2 = 10.116$ , d.f.  
660 = 9,  $P = 0.341$ ,  $n = 294$ ). Red and blue arrows represent significant ( $p < 0.05$ ) positive  
661 and negative pathways, respectively. Numbers near the pathway arrows indicate the  
662 standard path coefficients ( $\beta$ ). Width of the arrows are proportional to the strength of the  
663 relationship. Gray arrows represent residual correlations accounted for in the model.  
664 Plant Cover = Switchgrass (positive) or mixed annual grassland plant cover (negative) at  
665 the plot; Site = SL (positive) or CL (negative) soil site; CO<sub>2</sub> = total soil carbon dioxide  
666 flux; Soil Temp = soil temperature at a depth of 10 cm for bare soil in degrees Celsius;  
667 Soil Moisture = gravimetric per cent soil moisture; P = plant available phosphorus  
668 content; Microbial Alpha Diversity = number of observed bacterial species per sample;  
669 NO<sub>3</sub> = nitrate concentrations; CH<sub>4</sub> = methane flux; and pH = soil pH.

670

671

672

673



675 **Table**

676

677

**Table 1: Differences in physico-chemical soil properties for each site and treatment after 17-months.** Values are mean  $\pm$  SD values and significance was tested by Kruskal-Wallis rank sum test.

| Variable          | Silt Loam Fallow | Silt Loam Switchgrass | Kruskal-Wallis Tests |                     |             | Clay Loam Fallow | Clay Loam Switchgrass | Kruskal-Wallis Tests |                   |              |
|-------------------|------------------|-----------------------|----------------------|---------------------|-------------|------------------|-----------------------|----------------------|-------------------|--------------|
|                   | Mean $\pm$ SD    | Mean $\pm$ SD         | Chi-squared          | p                   | Effect Size | Mean $\pm$ SD    | Mean $\pm$ SD         | Chi-squared          | p                 | Effect Size  |
| pH                | 6.5 $\pm$ 0.67   | 6.7 $\pm$ 0.95        | 1.32                 | 0.25                | -           | 5.73 $\pm$ 0.44  | 5.85 $\pm$ 0.57       | 2.17                 | 0.14              | -            |
| Soil Moisture (%) | 7.1 $\pm$ 4.1    | 8.7 $\pm$ 6           | 3.27                 | 0.07                | -           | 10.4 $\pm$ 6.8   | 9.82 $\pm$ 5.5        | 0.75                 | 0.39              | -            |
| Total soil C (%)  | 0.47 $\pm$ 0.09  | 0.61 $\pm$ 0.12       | 118                  | < <b>0.0001</b> *** | 0.40 Large  | 1.3 $\pm$ 0.42   | 1.3 $\pm$ 0.36        | 0.86                 | 0.40              | -            |
| Total soil N (%)  | 0.06 $\pm$ 0.01  | 0.07 $\pm$ 0.01       | 55.4                 | < <b>0.0001</b> *** | 0.19 Medium | 0.11 $\pm$ 0.02  | 0.11 $\pm$ 0.02       | 0.27                 | 0.6               | -            |
| Phosphorus (ppm)  | 55.6 $\pm$ 13    | 73.7 $\pm$ 9.7        | 128                  | < <b>0.0001</b> *** | 0.44 Large  | 22.6 $\pm$ 9.7   | 17.5 $\pm$ 6.5        | 27.7                 | < <b>0.001</b> ** | 0.095 Medium |
| Nitrate (ppm)     | 3.5 $\pm$ 3.7    | 2.2 $\pm$ 3           | 16.8                 | < <b>0.001</b> **   | 0.06 Small  | 8.3 $\pm$ 9.8    | 8.9 $\pm$ 15          | 2.37                 | 0.12              | -            |
| Ammonium (ppm)    | 13.6 $\pm$ 11    | 14.5 $\pm$ 10         | 1.73                 | 0.19                | -           | 18.5 $\pm$ 11    | 17.9 $\pm$ 11.5       | 0.61                 | 0.44              | -            |

\*Effect size shown by *epsilon* squared with small (0.01 - < 0.08), medium (0.08 - < 0.26), and large ( $\geq$  0.26) ranges.

678

679

680



681

## 682 Figures

683

684

685

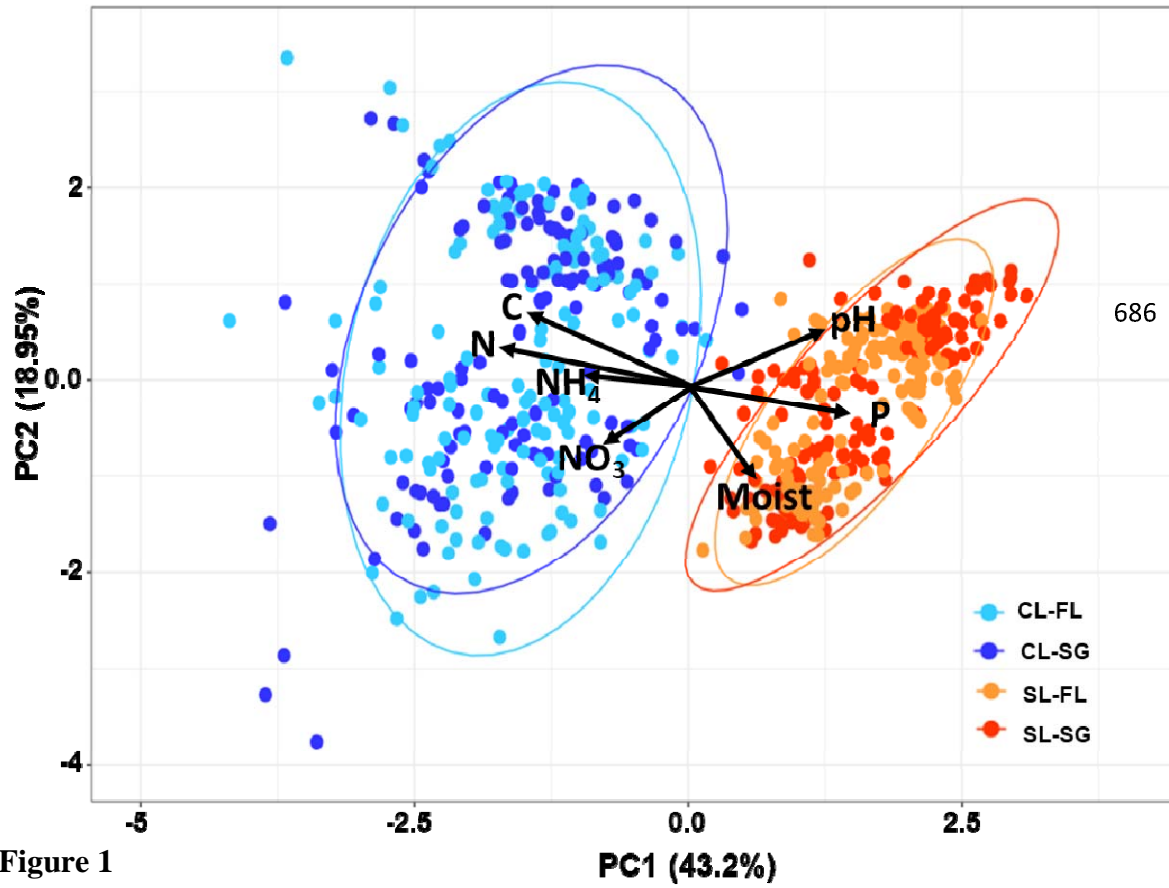

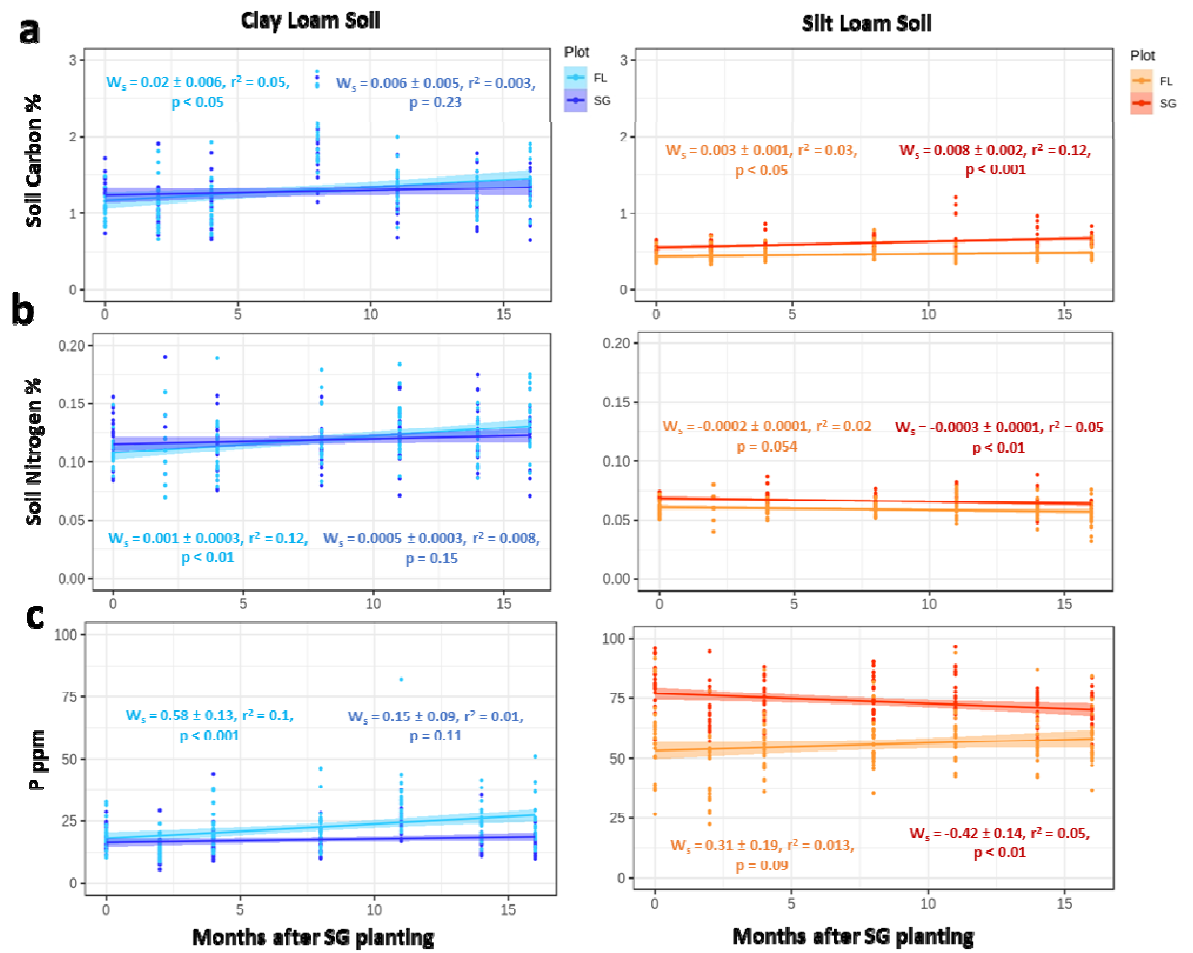

688

689 **Figure 2**

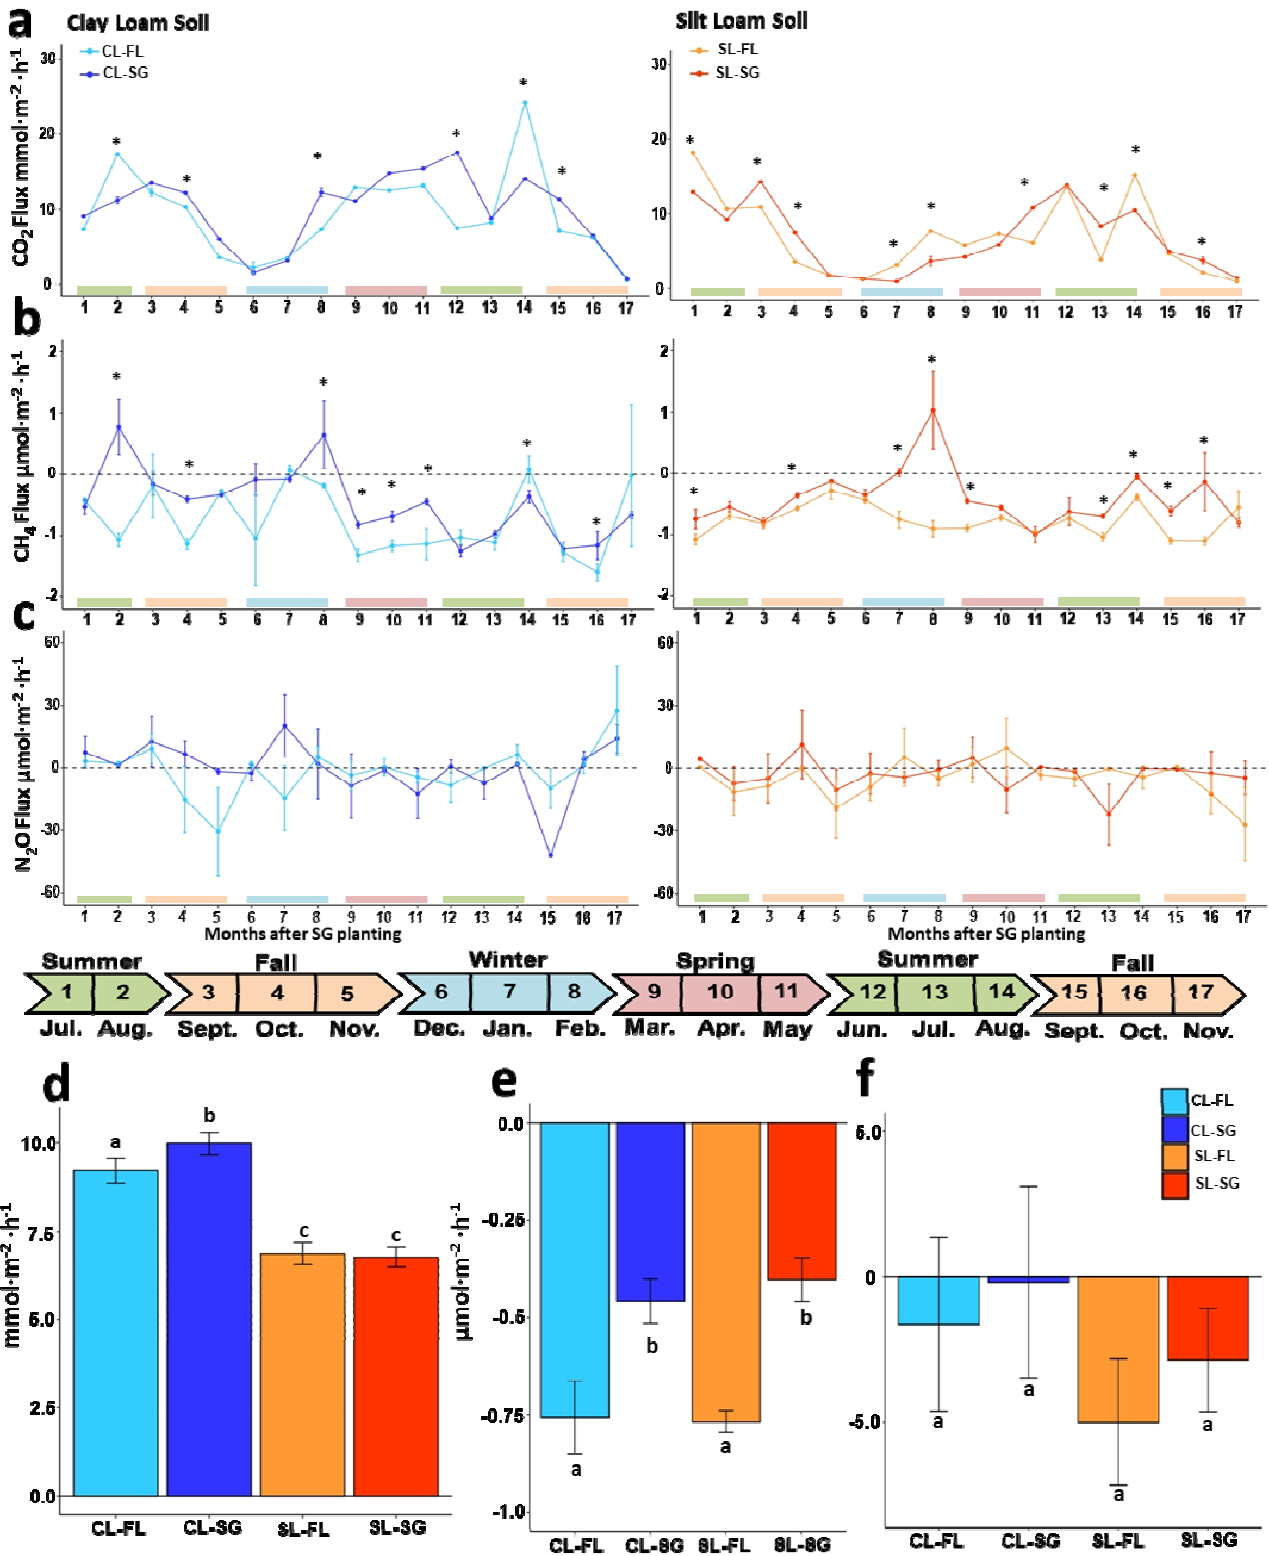

690

691 Figure 3

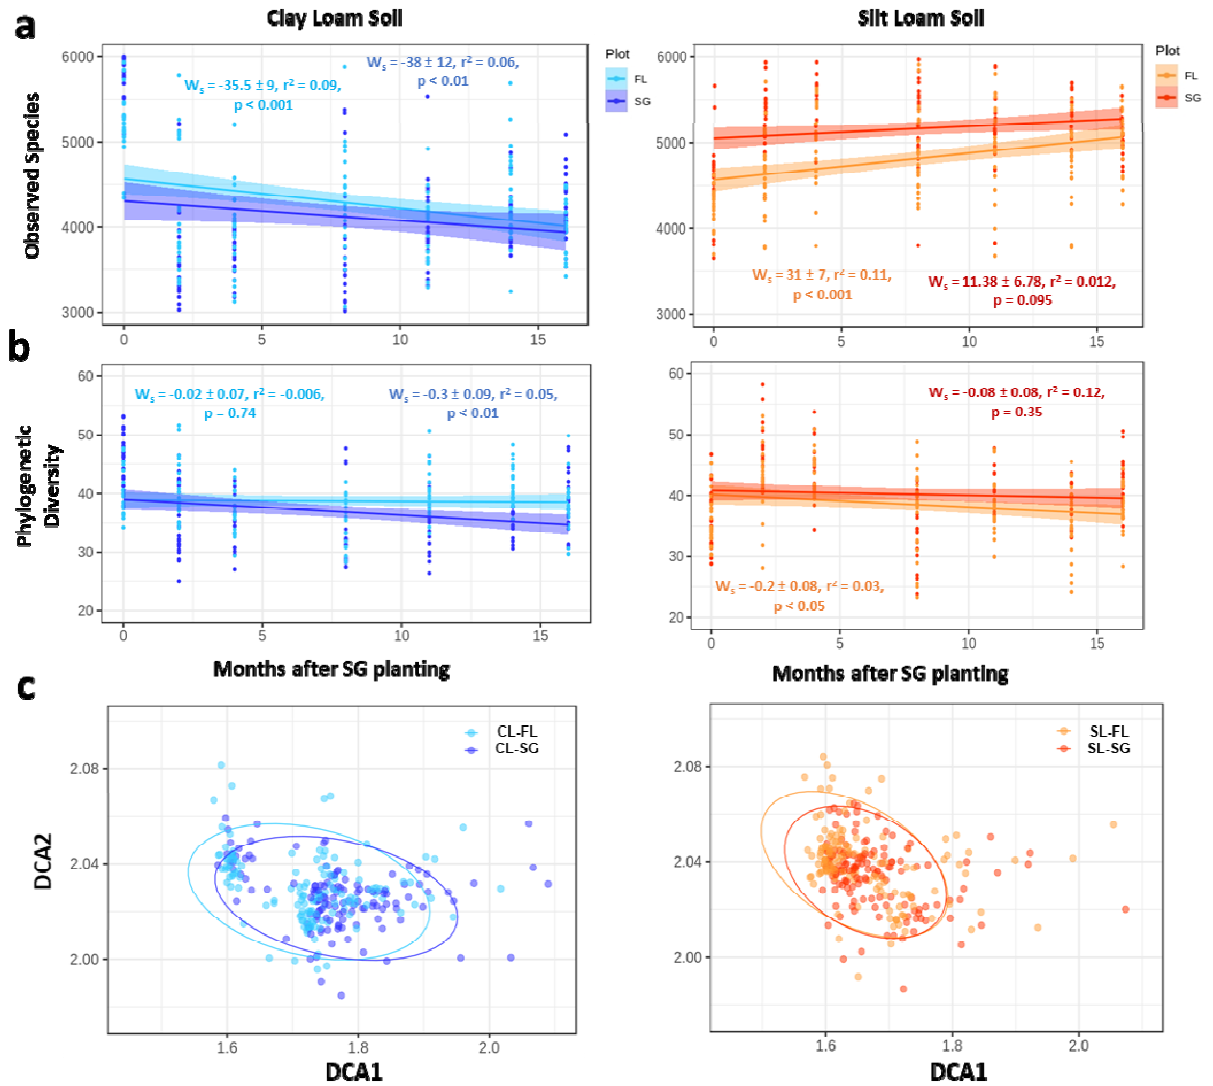

692

693 **Figure 4**

694

695

696

697

698

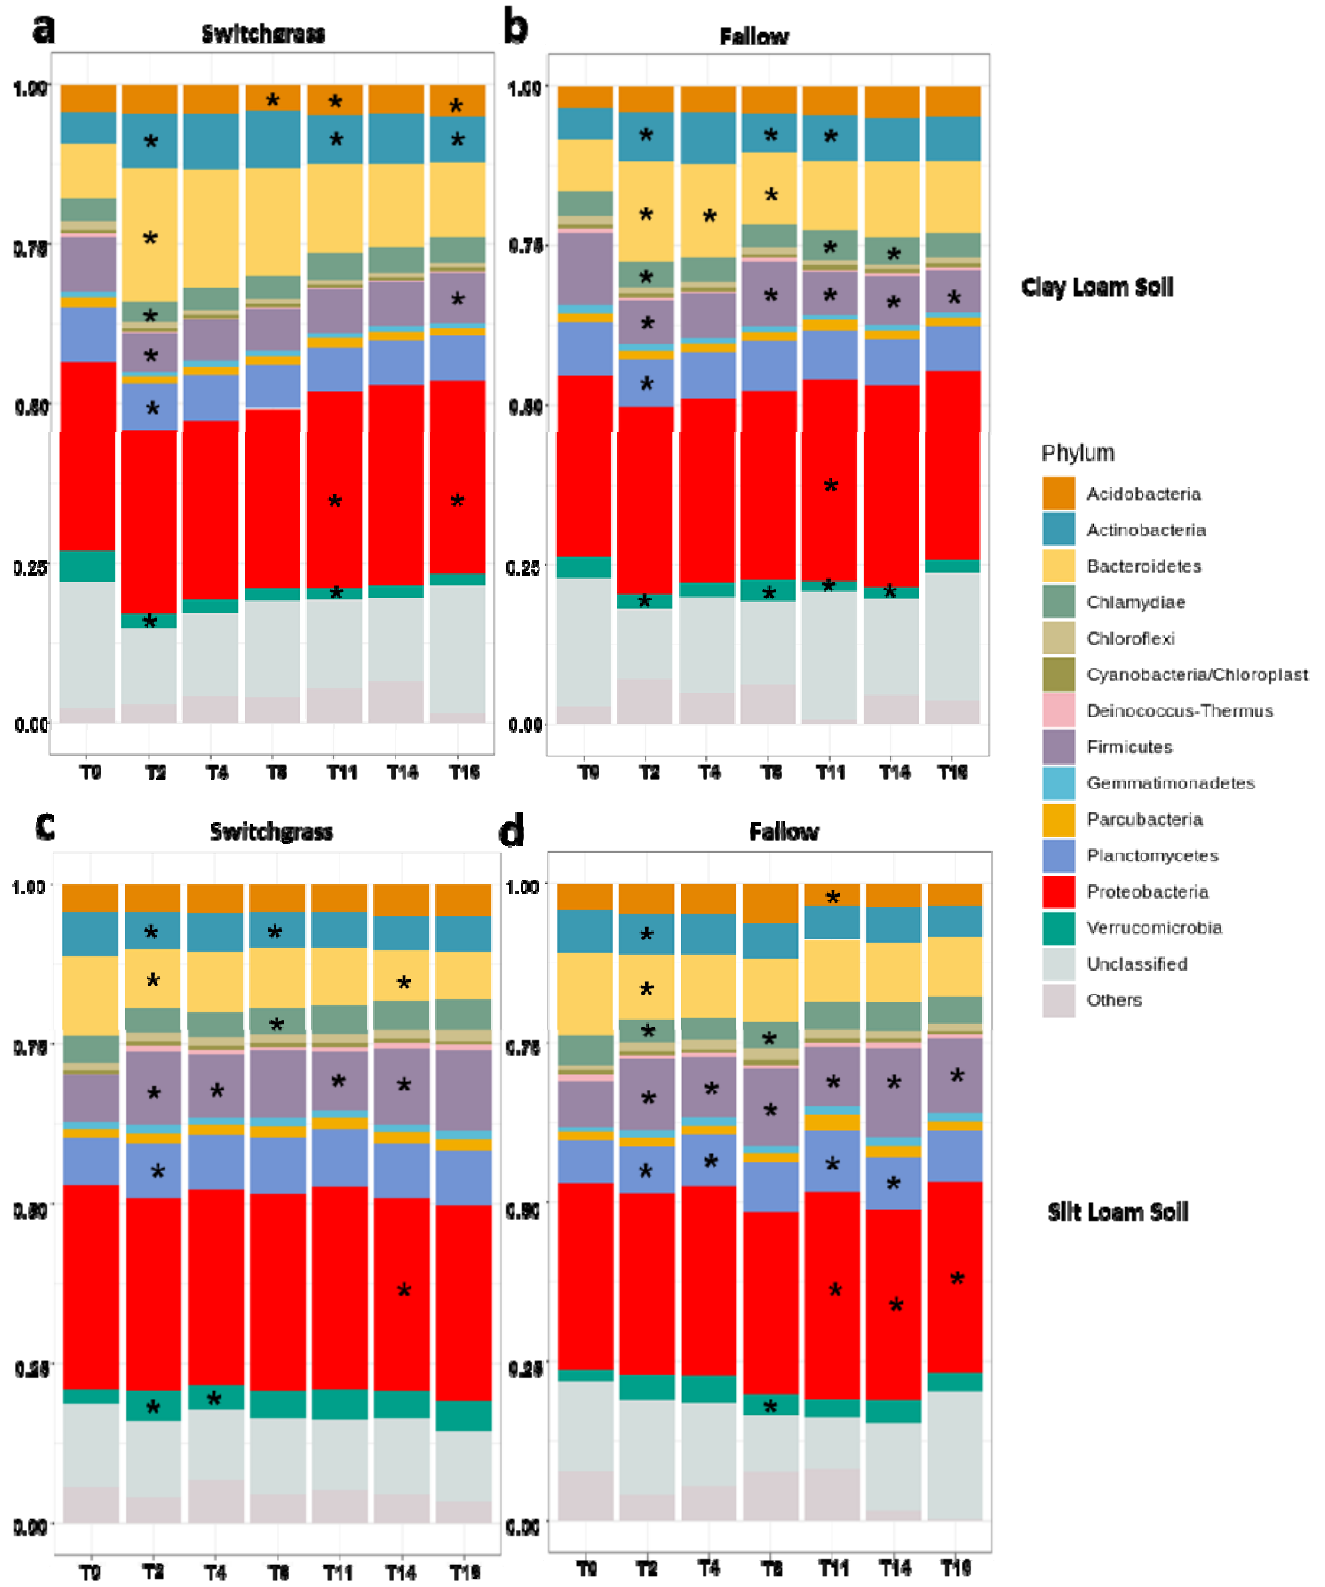

699

700 **Figure 5**

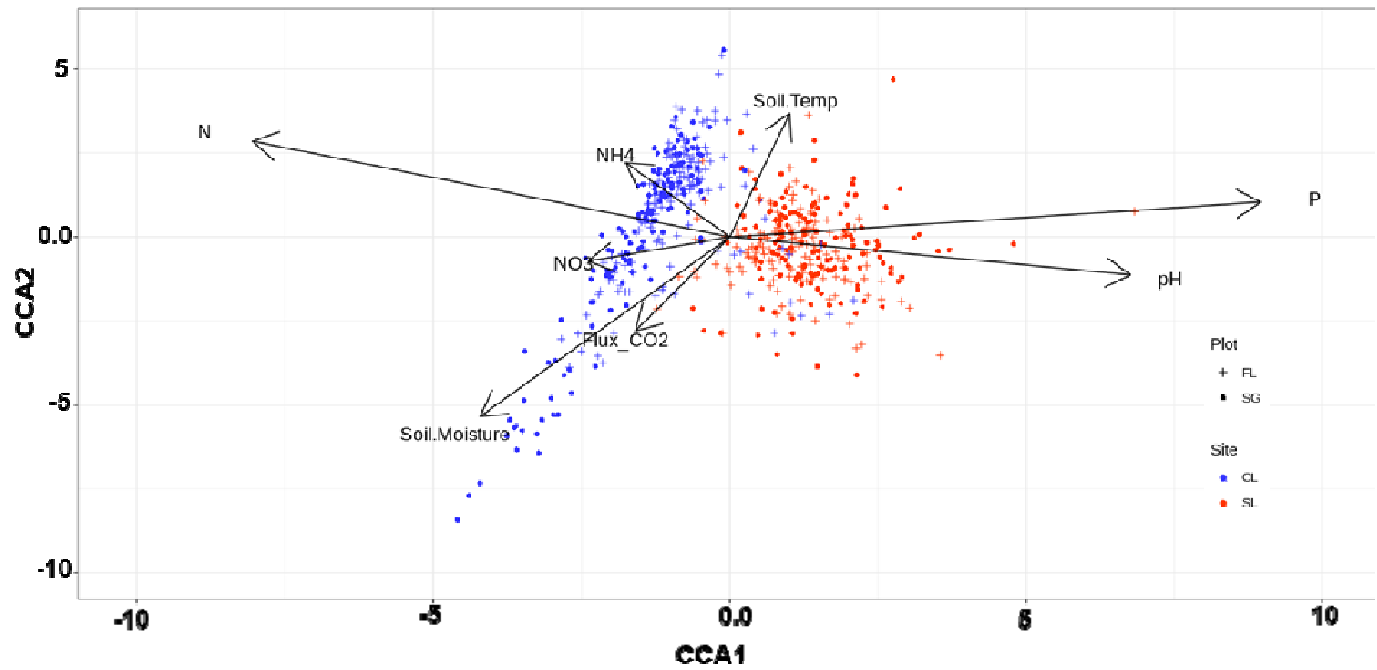

701

702 **Figure 6**

703

704

705

706

707

708

709

710

711

712

713

714

715

716

717

718

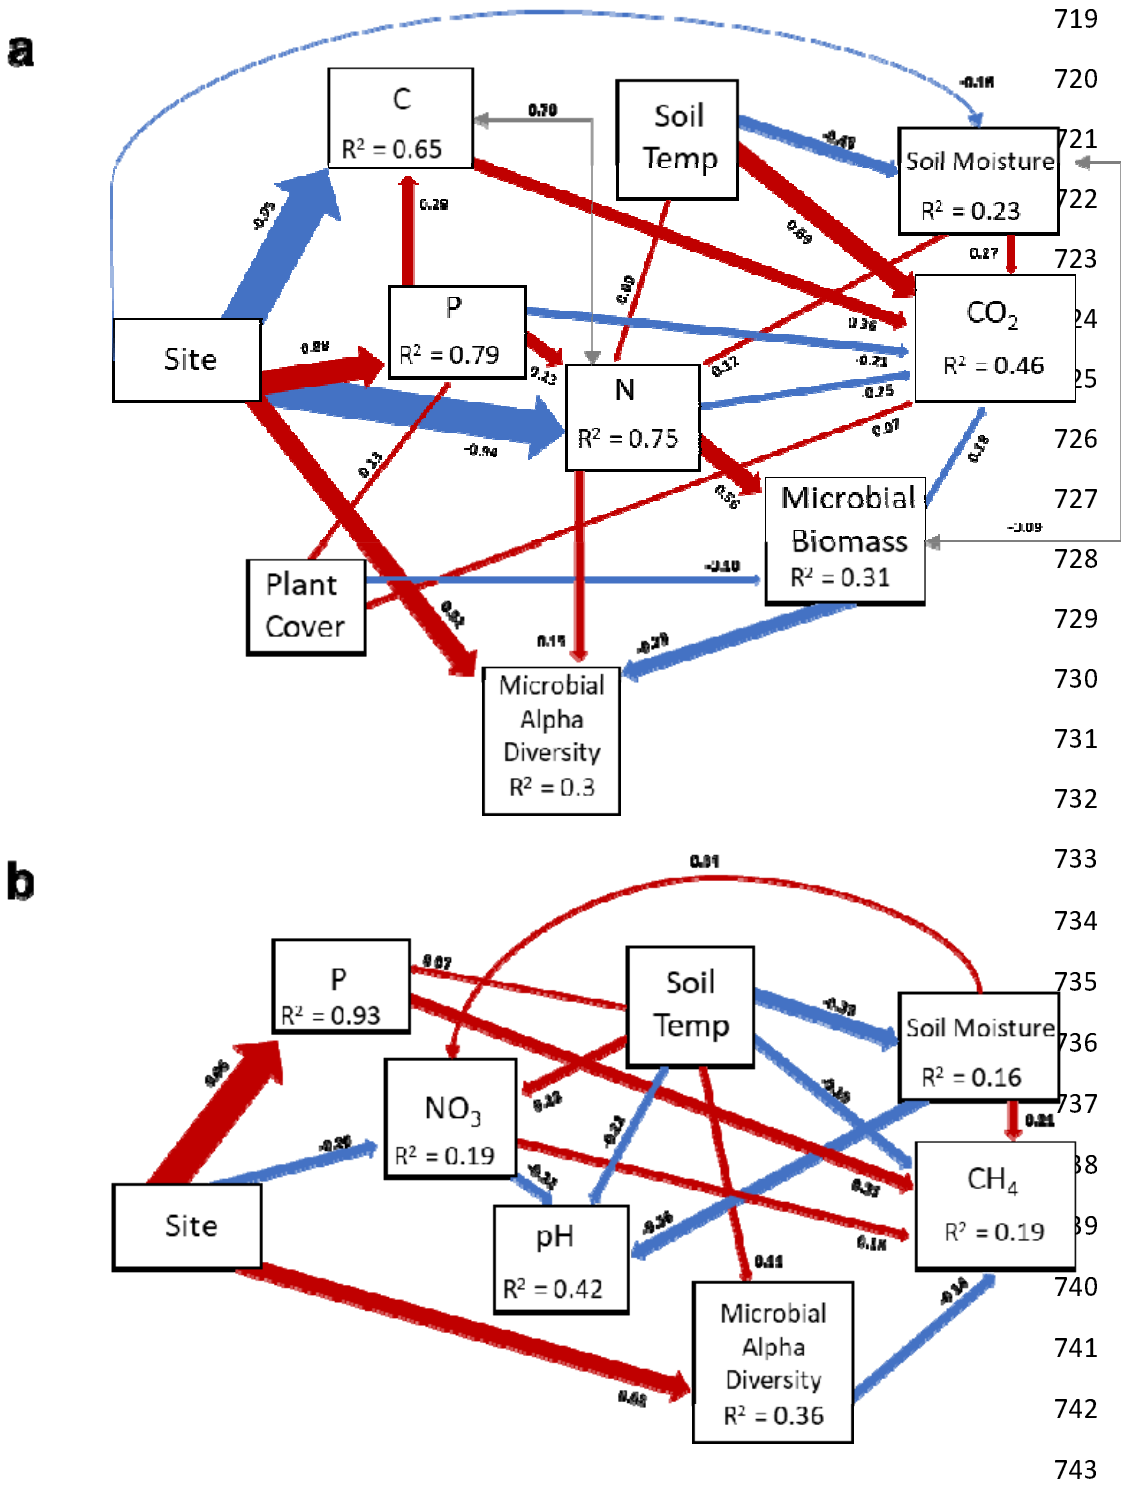

744 **Figure 7**

745

746

747

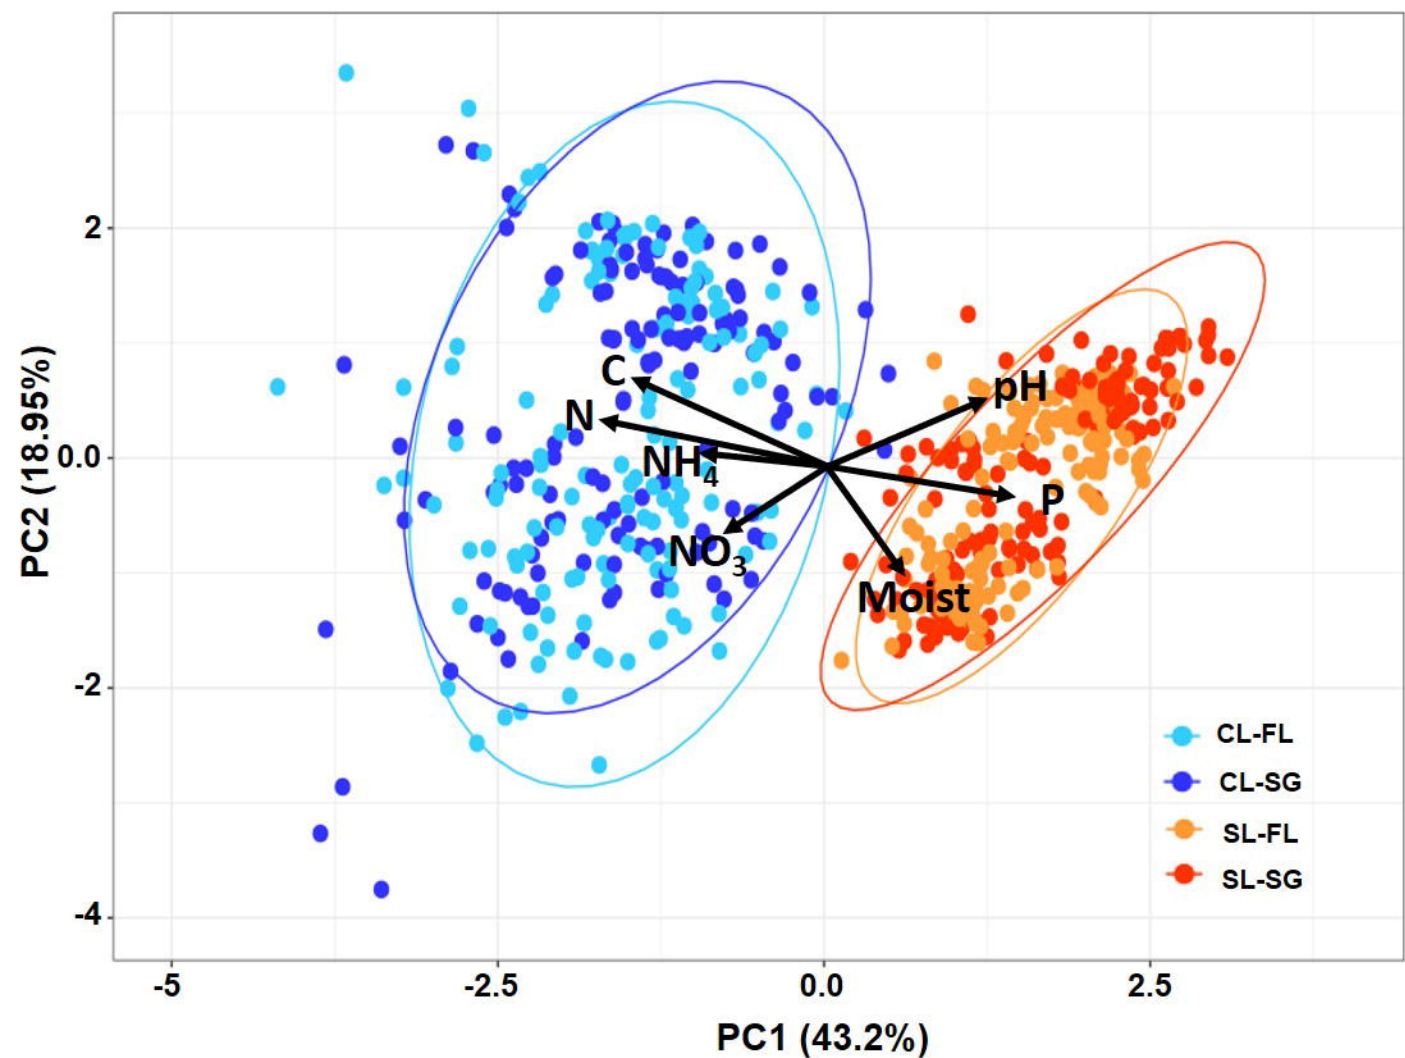

**Figure 1. Differences in soil geochemical properties between the two studied sites.** Principal component analysis. Blue colors represent the CL site while red/orange colors signify the SL site. Dark colors represent the SG samples. Variation contained in each PC axis are displayed next to each axis.



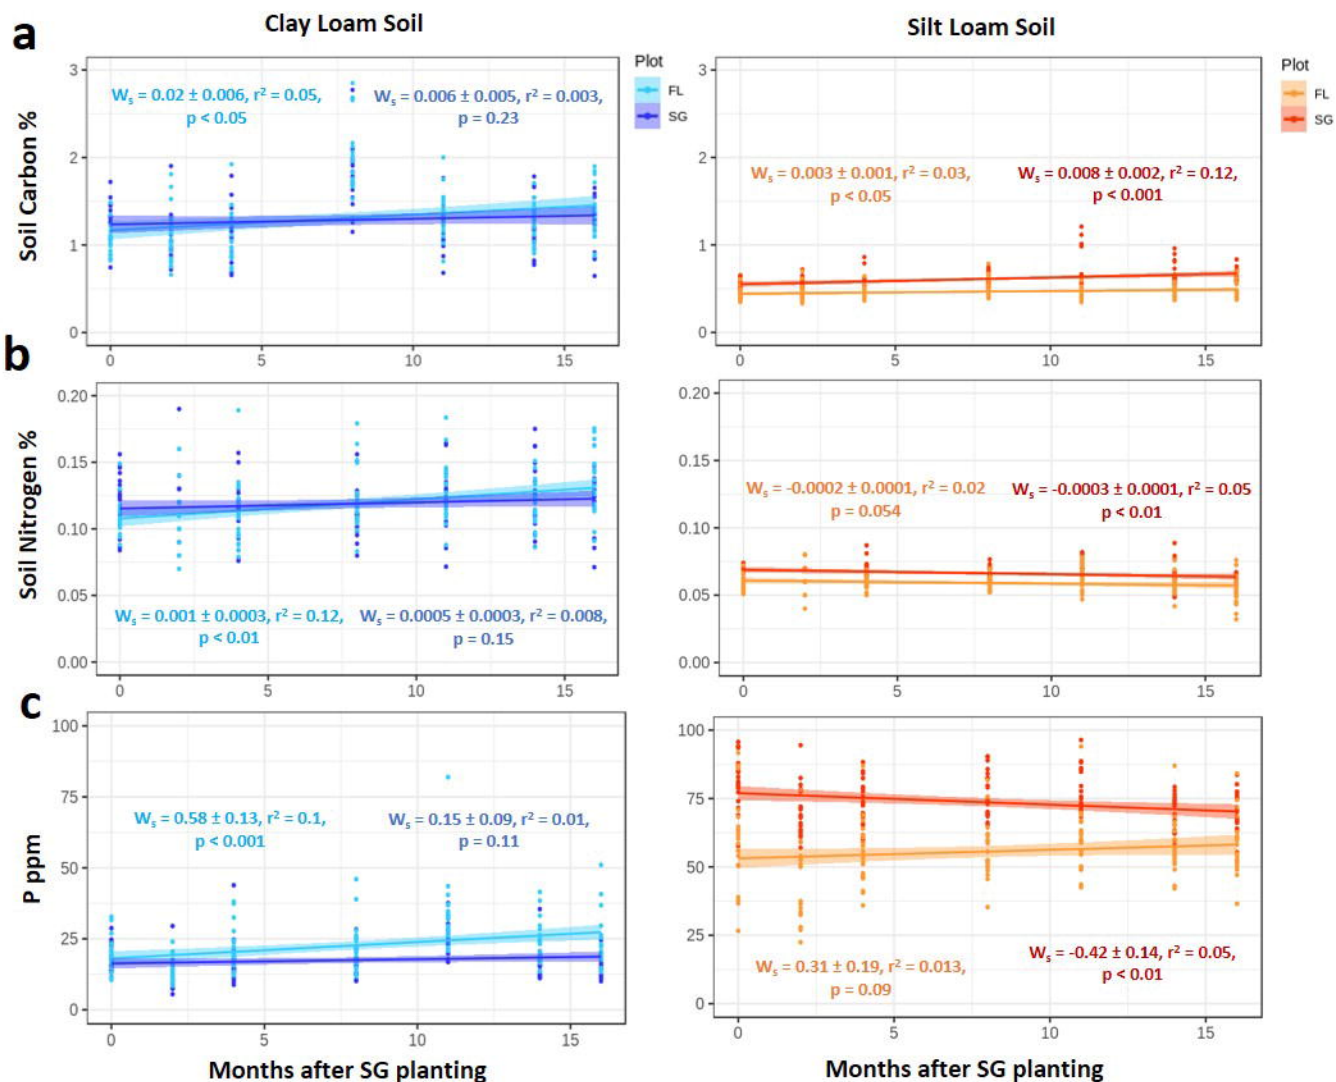

**Figure 2. Changes in soil chemistry through two seasons of switchgrass establishment.** **a**, Total soil carbon percentages; **b**, Total soil nitrogen percentages; **c**, Concentration of plant available phosphate content in parts per million. The best linear model describing the relationship is presented.  $W_s$ : estimated model slope and associated error. p-values represent the significance of each model. Each time point is comprised of twenty-one replicates per plot.

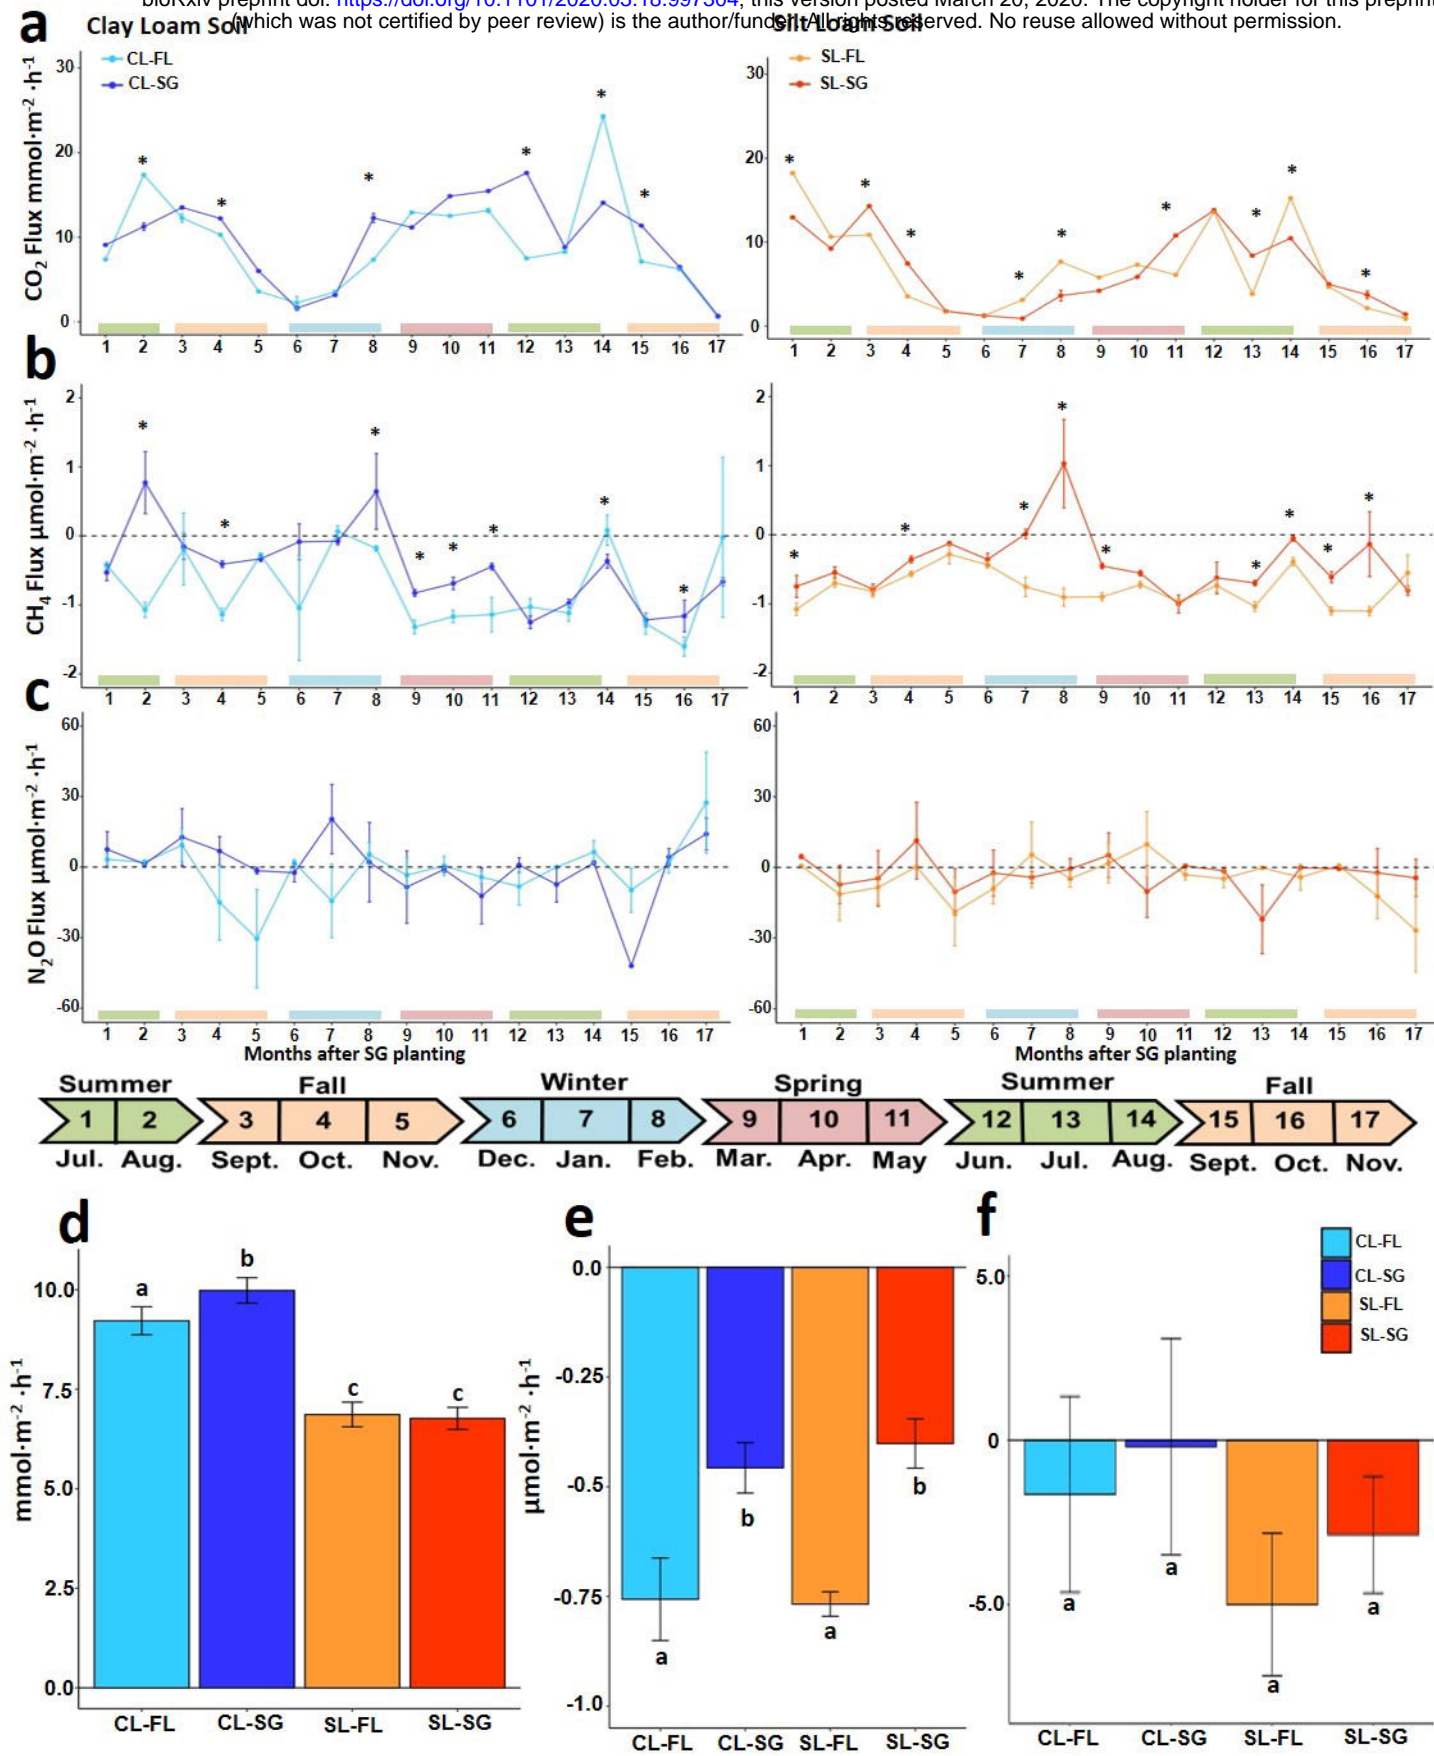

**Figure 3. Greenhouse gas (GHG) fluxes during grassland conversion to switchgrass.** **a, b, c:** GHG fluxes at each site over 17 months (mean and standard error estimated using 21 replicates for each time points) for: **a**, carbon dioxide flux; **b**, methane flux; **c**, nitrous oxide. **d, e, f:** Average GHG fluxes over 17-months for: **d**, carbon dioxide; **e**, methane flux; **f**, nitrous oxide flux. Different letters and asterisk indicate significant difference between groups by Wilcoxon sign test with p-value < 0.01.

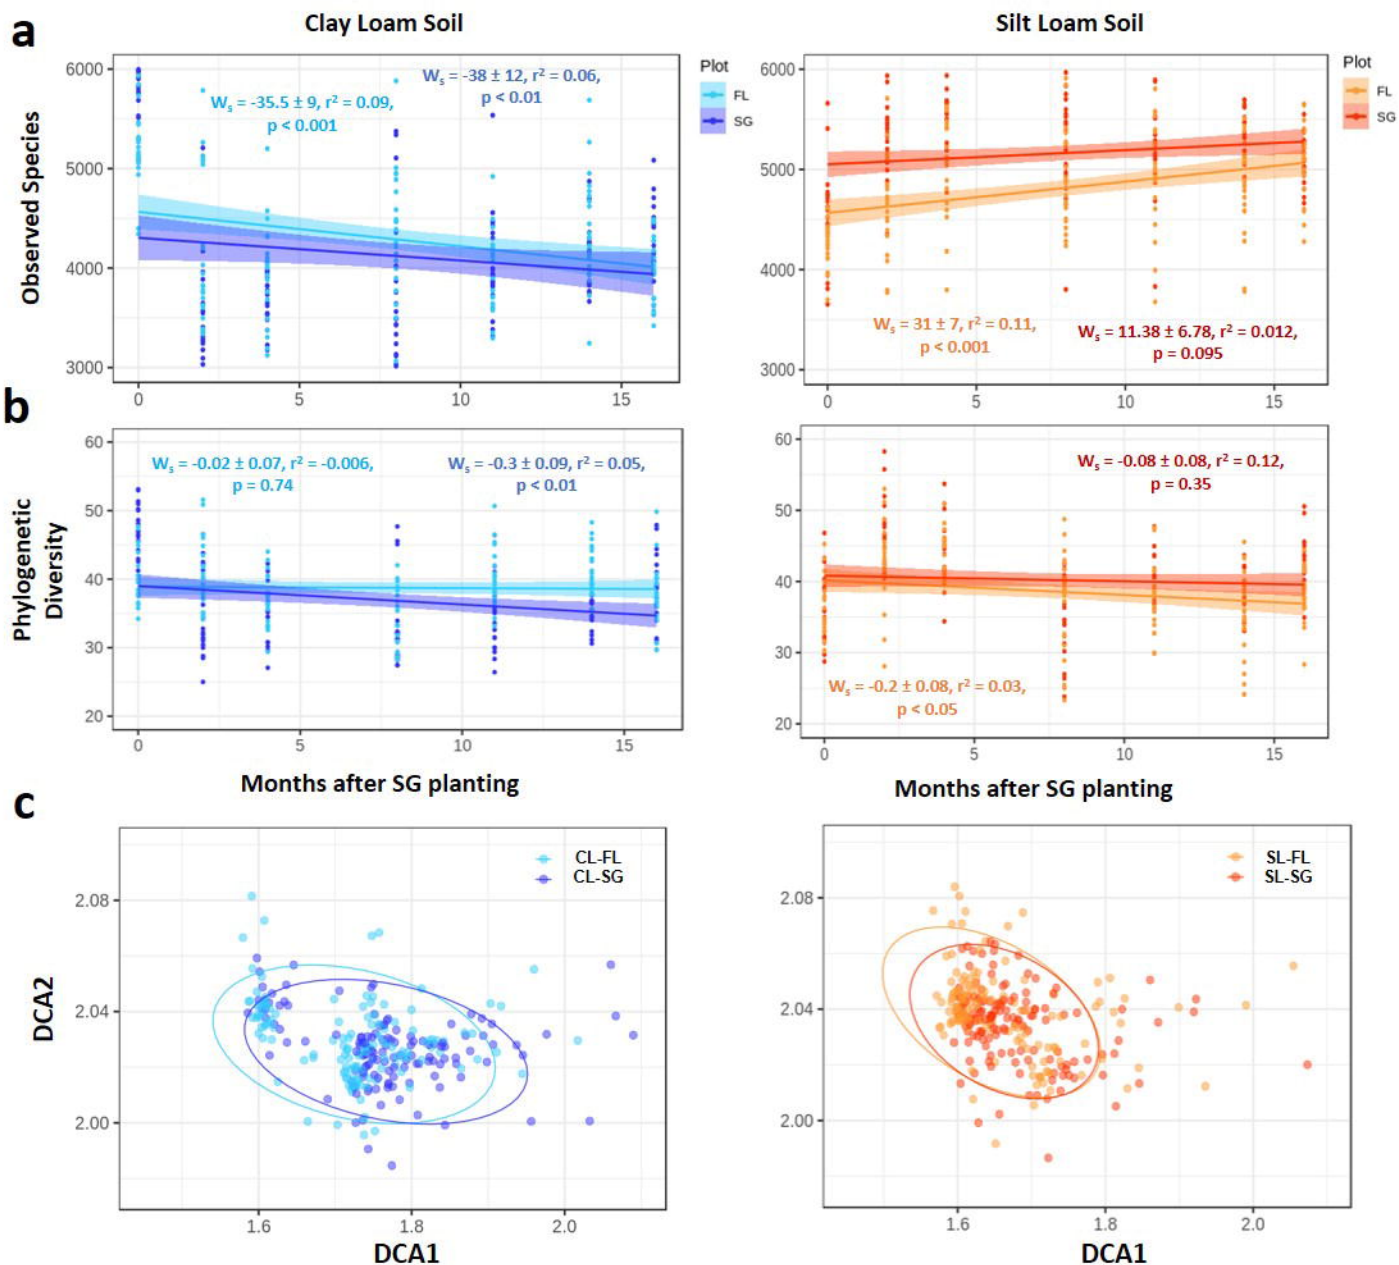

**Figure 4. Changes in microbial diversity and structure in response to switchgrass planting.** **a**, Number of observed species through time; **b**, Phylogenetic diversity. **c**, Detrended correspondence analysis of the 16S community separated by site for all time points and plots. Significant differences were found between sites, plant cover types, and through time (PERMANOVA,  $p < 0.01$ ). Dark colors represent the switchgrass samples.

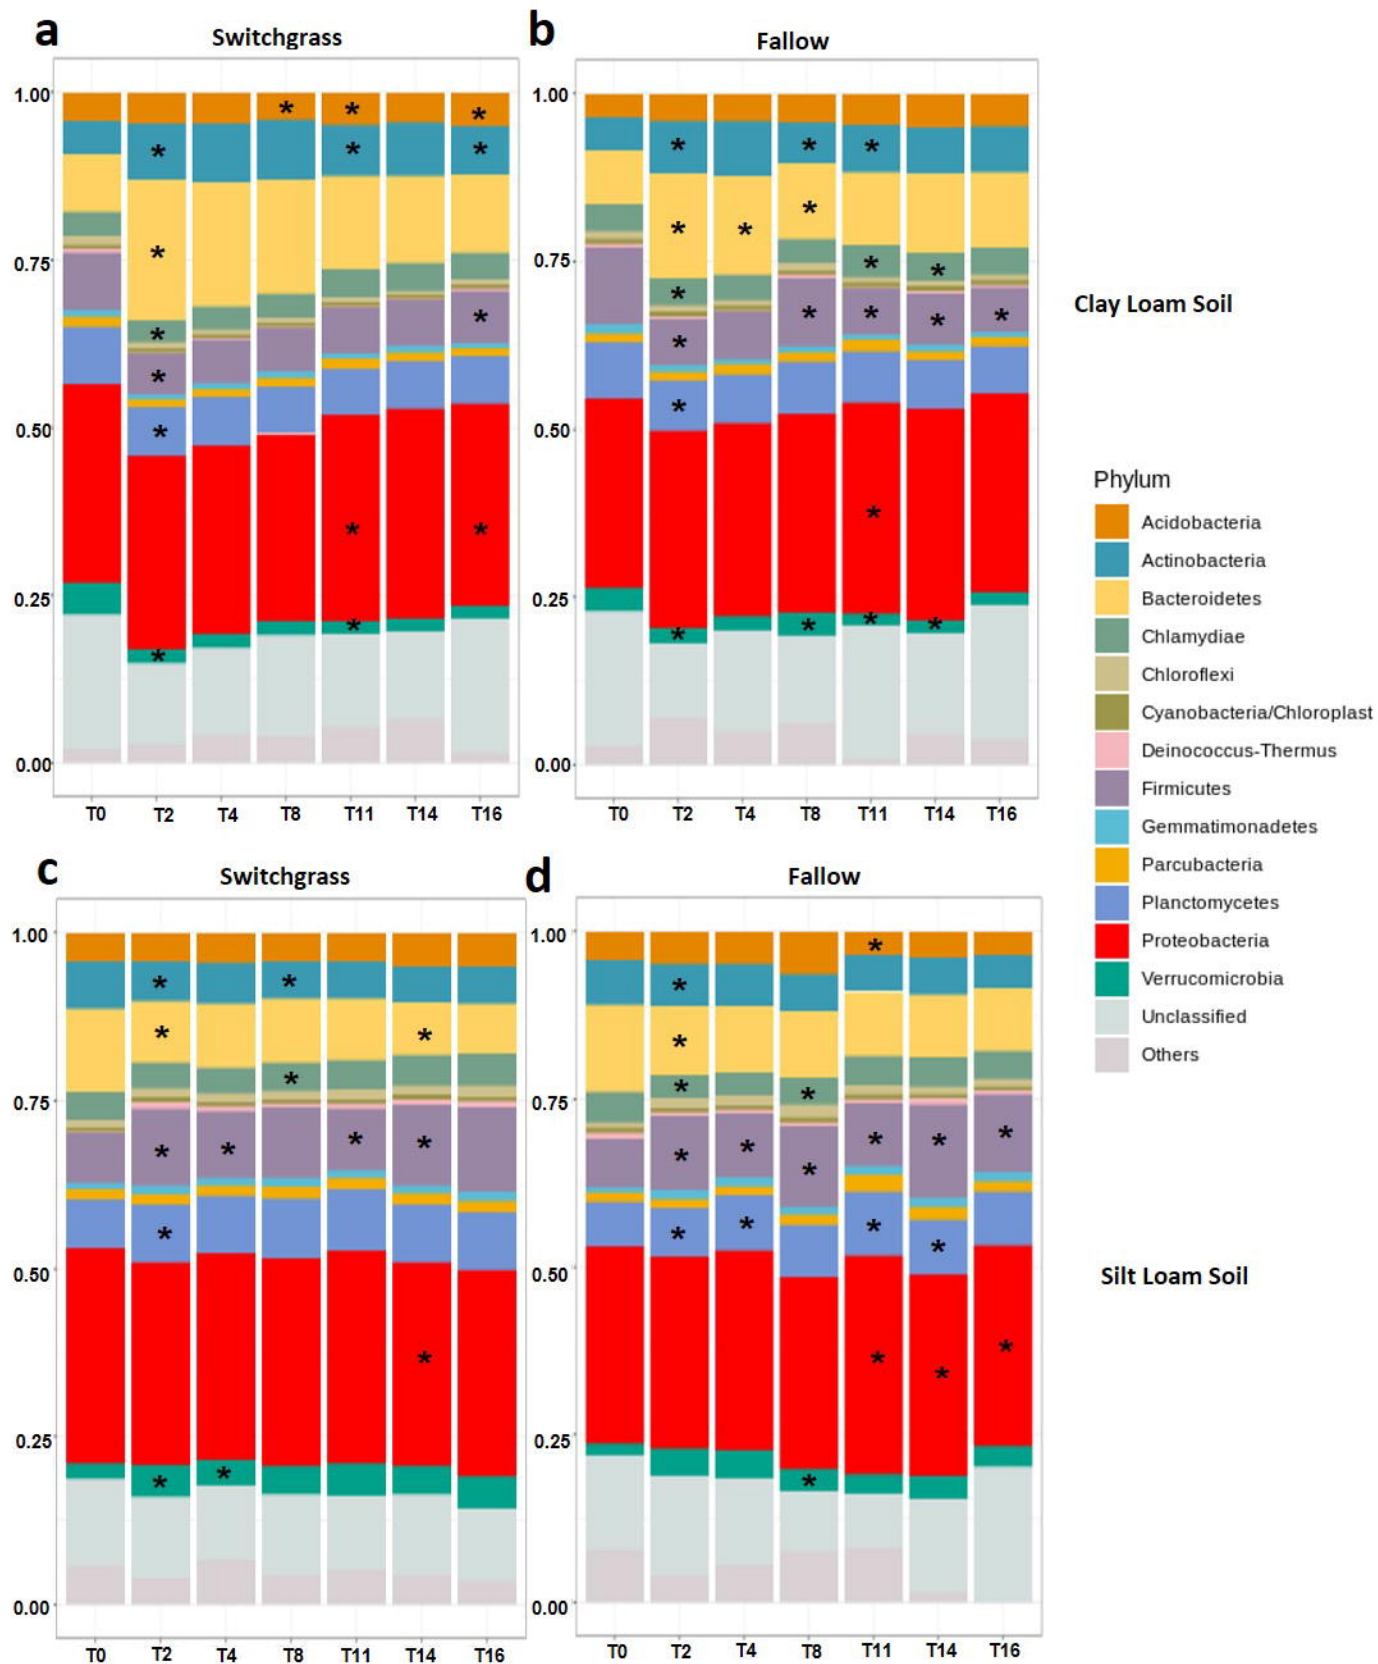

**Figure 5. Changes of relative abundance for major phyla.** Taxonomic identity was determined with the RDP classifier at 80% sequence match criteria. OTU table was trimmed by abundant OTUs ( $> 0.001\%$ ). Difference between time points within each plot for: **a**, Clay-loam switchgrass (CL-SG) plot; **b**, Clay-loam fallow (CL-FL) plot; Silt-loam switchgrass (SL-SG) plot; Silt-loam fallow (SL-FL) plot. Significant differences between the previous time point for each group denoted by asterisk (\*) symbols within each phyla bar.

**a**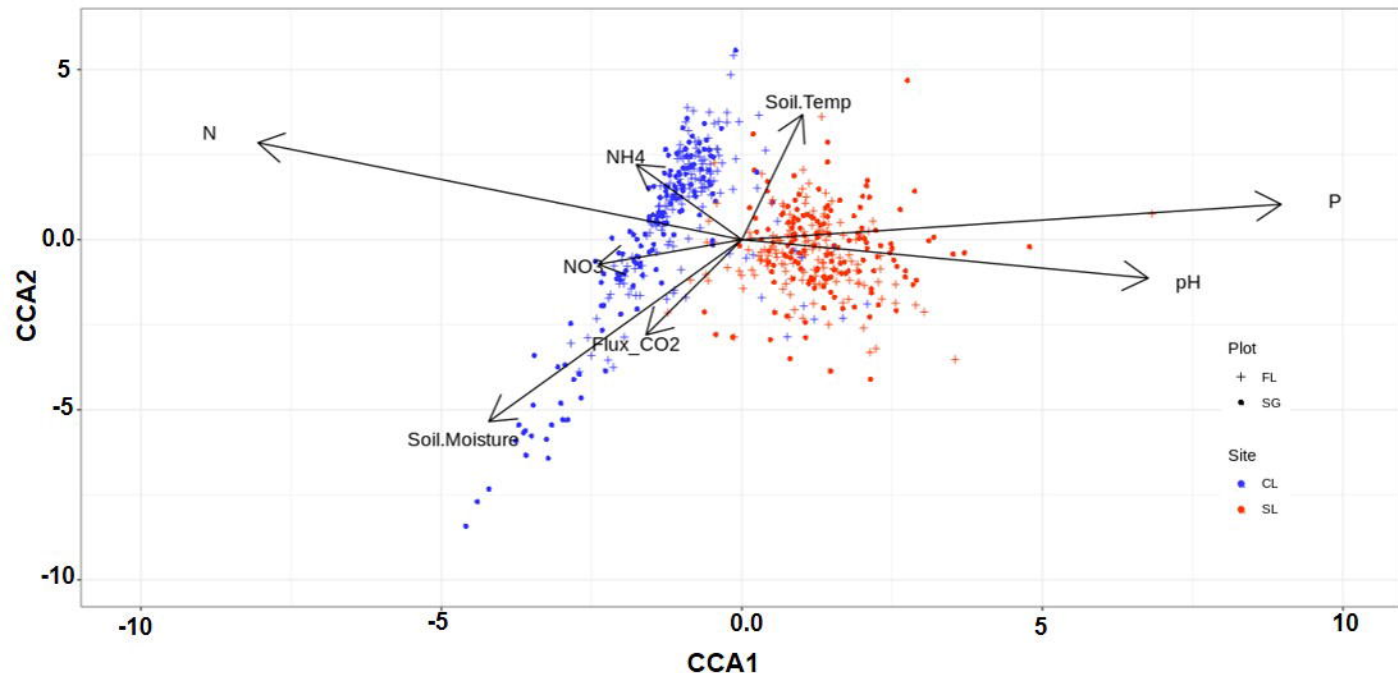

**Figure 6. Relationships between environmental factors and microbial communities structure.** Canonical correspondence analysis (CCA) linking microbial communities structure with environmental variables. Samples are shown by plot and site type with significant environmental variables shown in black arrows.

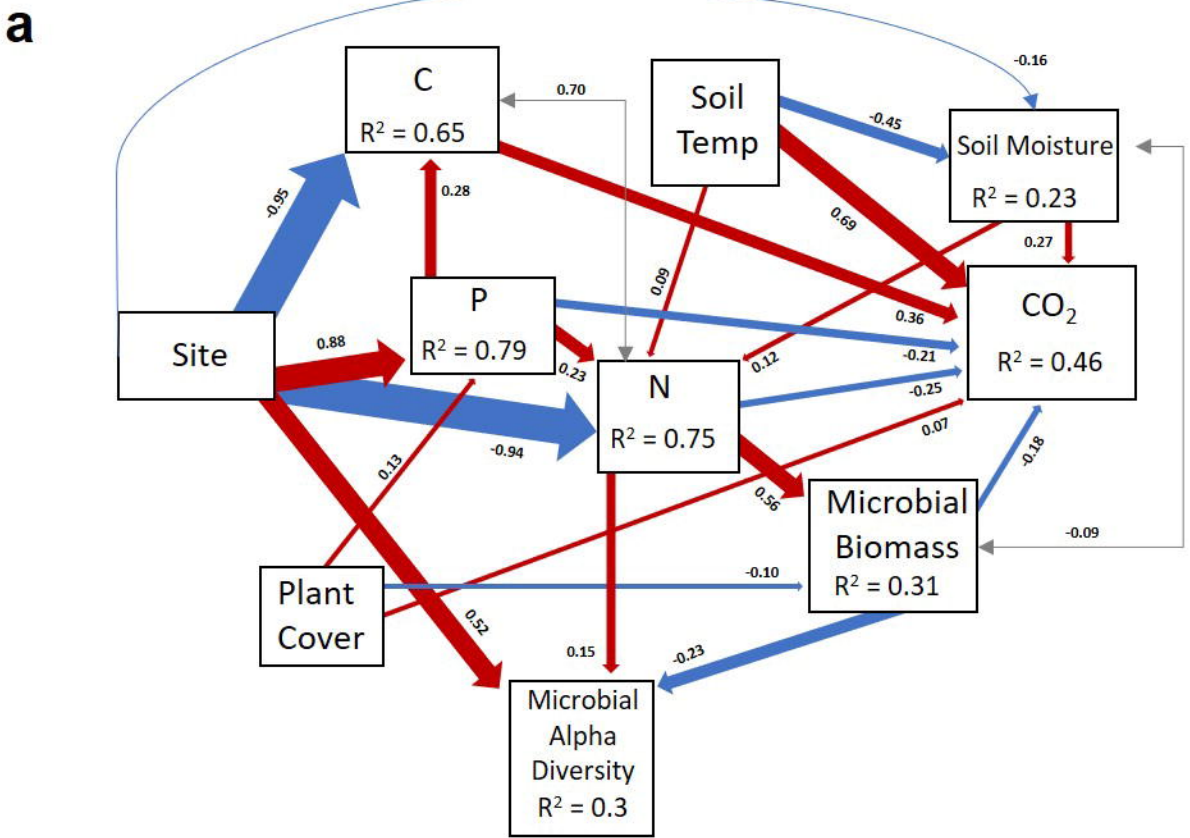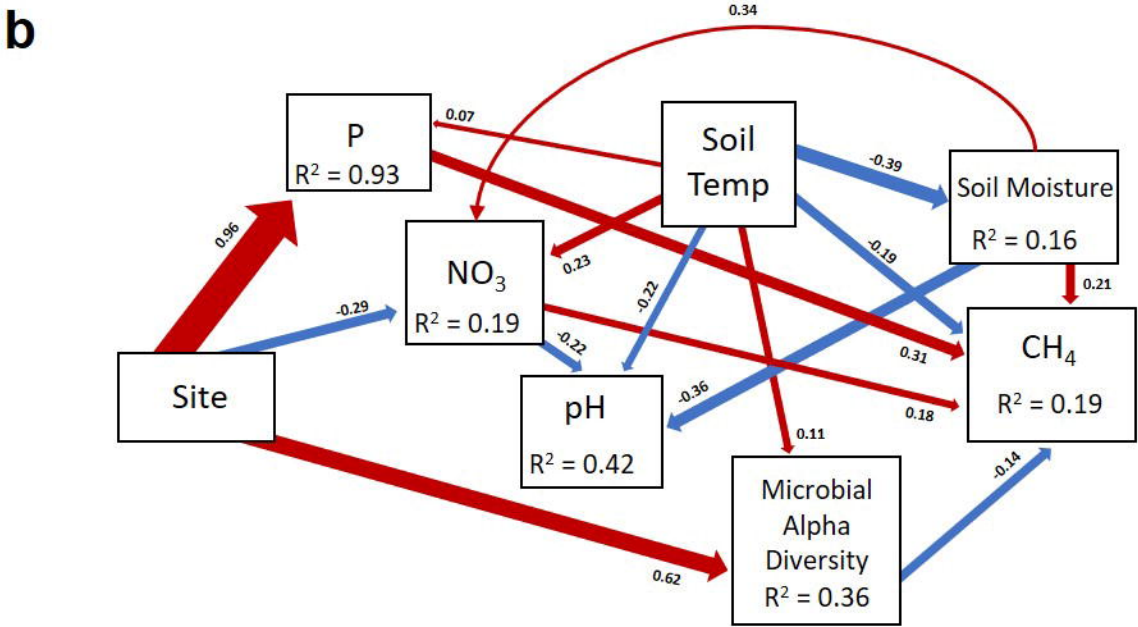

**Figure 7. Structural equation modeling showing the relationships among environmental variables and GHG fluxes. a:** Model for total carbon dioxide flux generated from the seasonal data ( $\chi^2 = 25.806$ , d.f. = 18,  $P = 0.104$ ,  $n = 588$ ). **b:** Model for methane flux generated from seasonal data of switchgrass plots only ( $\chi^2 = 10.116$ , d.f. = 9,  $P = 0.341$ ,  $n = 294$ ). Red and blue arrows represent significant ( $p < 0.05$ ) positive and negative pathways, respectively. Numbers near the pathway arrows indicate the standard path coefficients ( $\beta$ ). Width of the arrows are proportional to the strength of the relationship. Gray arrows represent residual correlations accounted for in the model. Plant Cover = Switchgrass (positive) or mixed annual grassland plant cover (negative) at the plot; Site = SL (positive) or CL (negative) soil site; CO<sub>2</sub> = total soil carbon dioxide flux; Soil Temp = soil temperature at a depth of 10 cm for bare soil in degrees Celsius; Soil Moisture = gravimetric per cent soil moisture; P = plant available phosphorus content; Microbial Alpha Diversity = number of observed bacterial species per sample; NO<sub>3</sub> = nitrate concentrations; CH<sub>4</sub> = methane flux; and pH = soil pH.

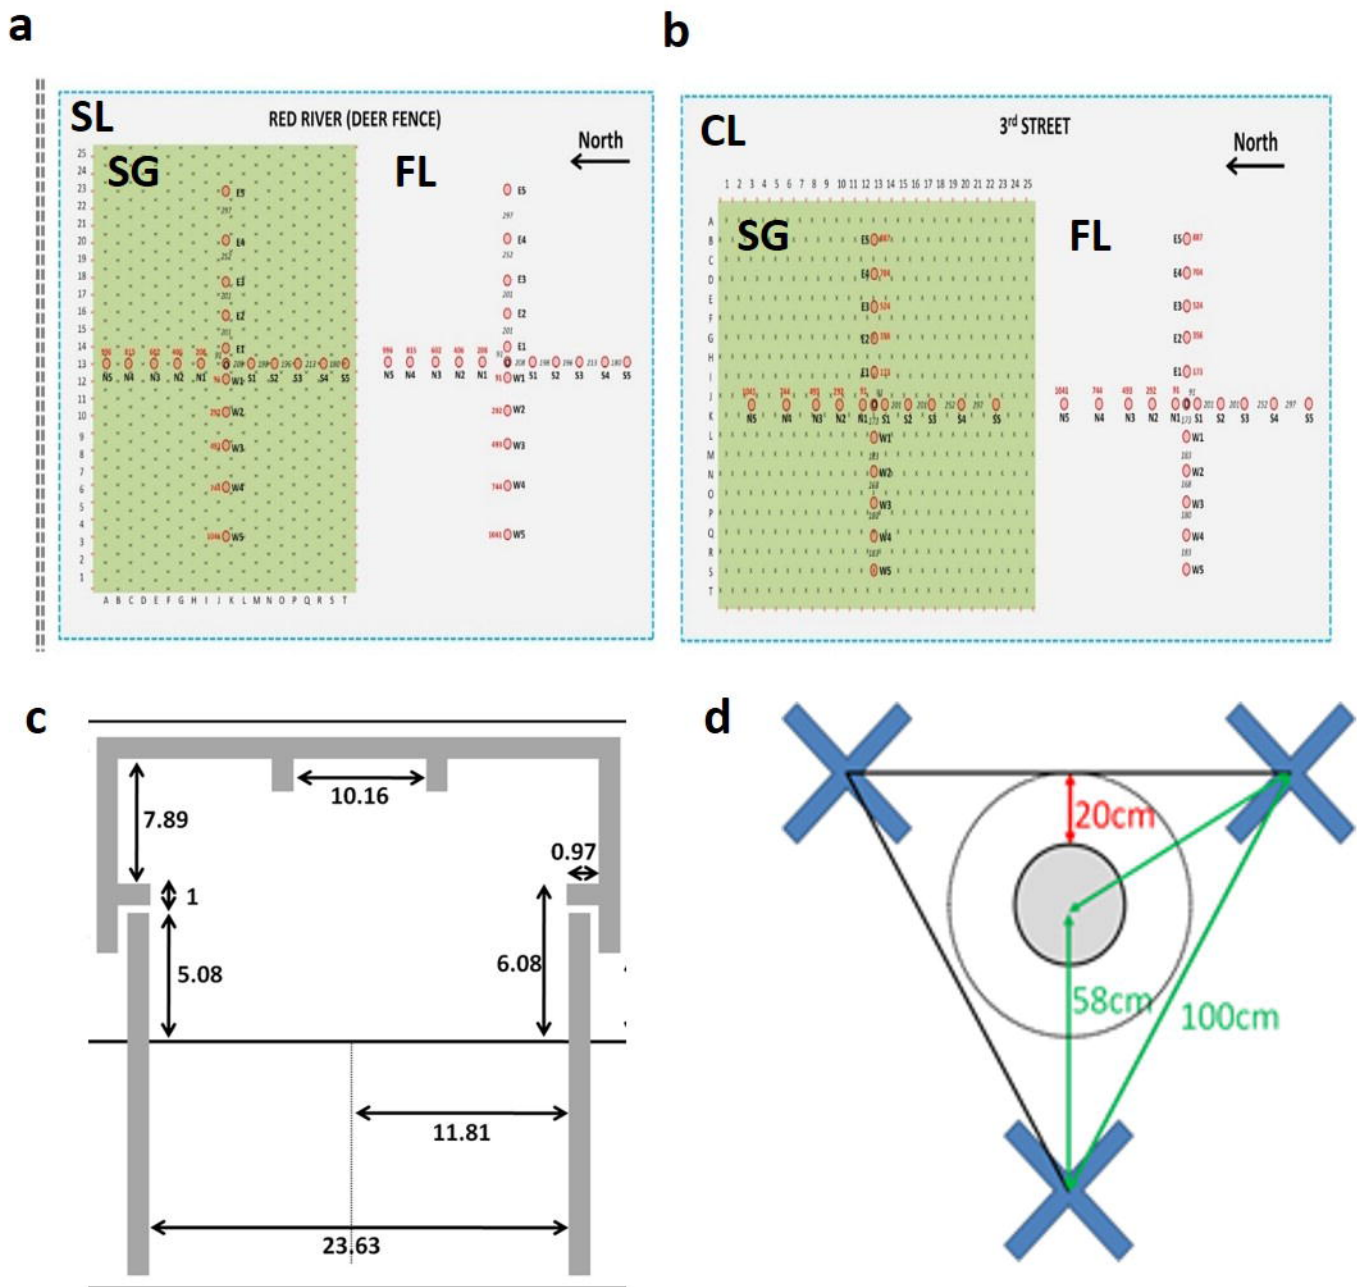

**Fig. S1, Layout for the field sites, collar positions, and soil sampling details:** **a**, layout of the SL field site and location of trace gas collars for each plot; **b**, layout of the CL field site and location of the trace gas collars for each plot; **c**, diagram of trace gas collar and chamber dimensions; **d**, diagram of collar position in relation to switchgrass plants and soil sampling details. Blue X's represent switchgrass plants and the gray circle represents the trace gas collar.

**a**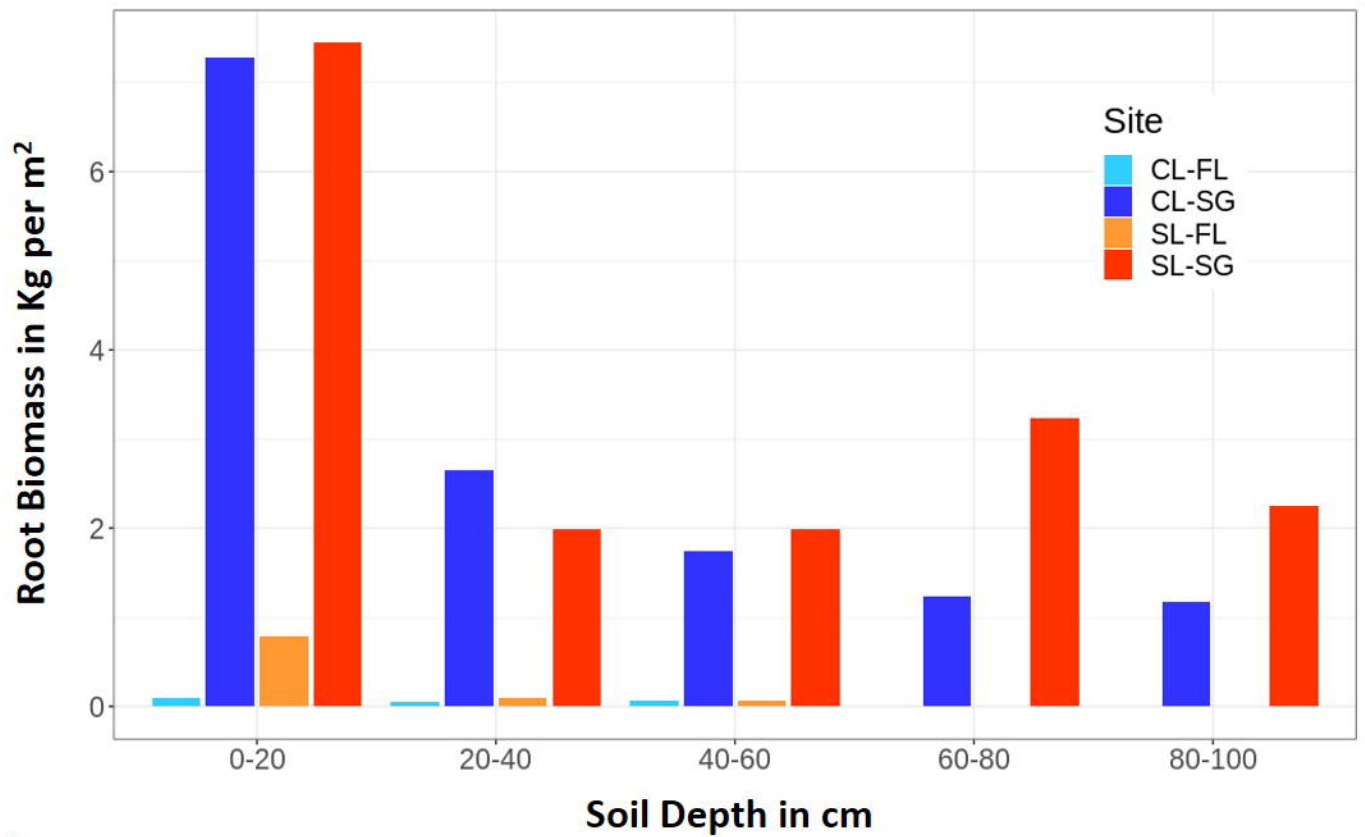**b**

6 Target plants from each SG plot selected

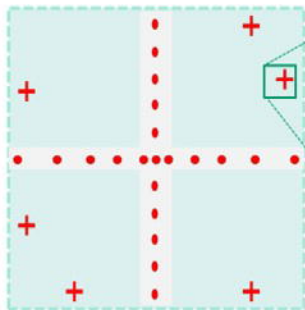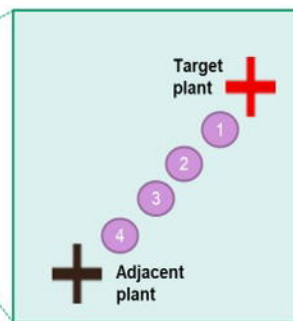

4 Soil Cores with 5 Depths  
between 2 plants:  
0-20, 20-40, 40-60, 60-80, 80-100 cm

**c**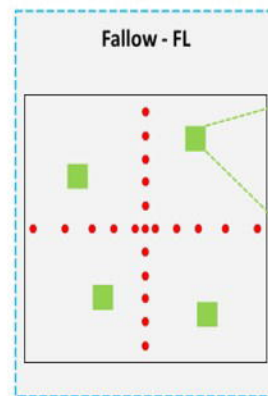4 subplots  
1 m<sup>2</sup>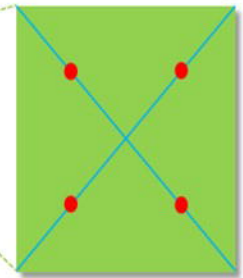

**Fig. S2, Root biomass estimates and methods for:** **a**, difference between fallow and switchgrass plots for estimated root biomass by depths; **b**, graphic for how switchgrass plants were selected for root biomass estimation; **c**, graphic for how fallow root biomass estimation was conducted using four 1 m<sup>2</sup> subplots in each quadrant of the plot.



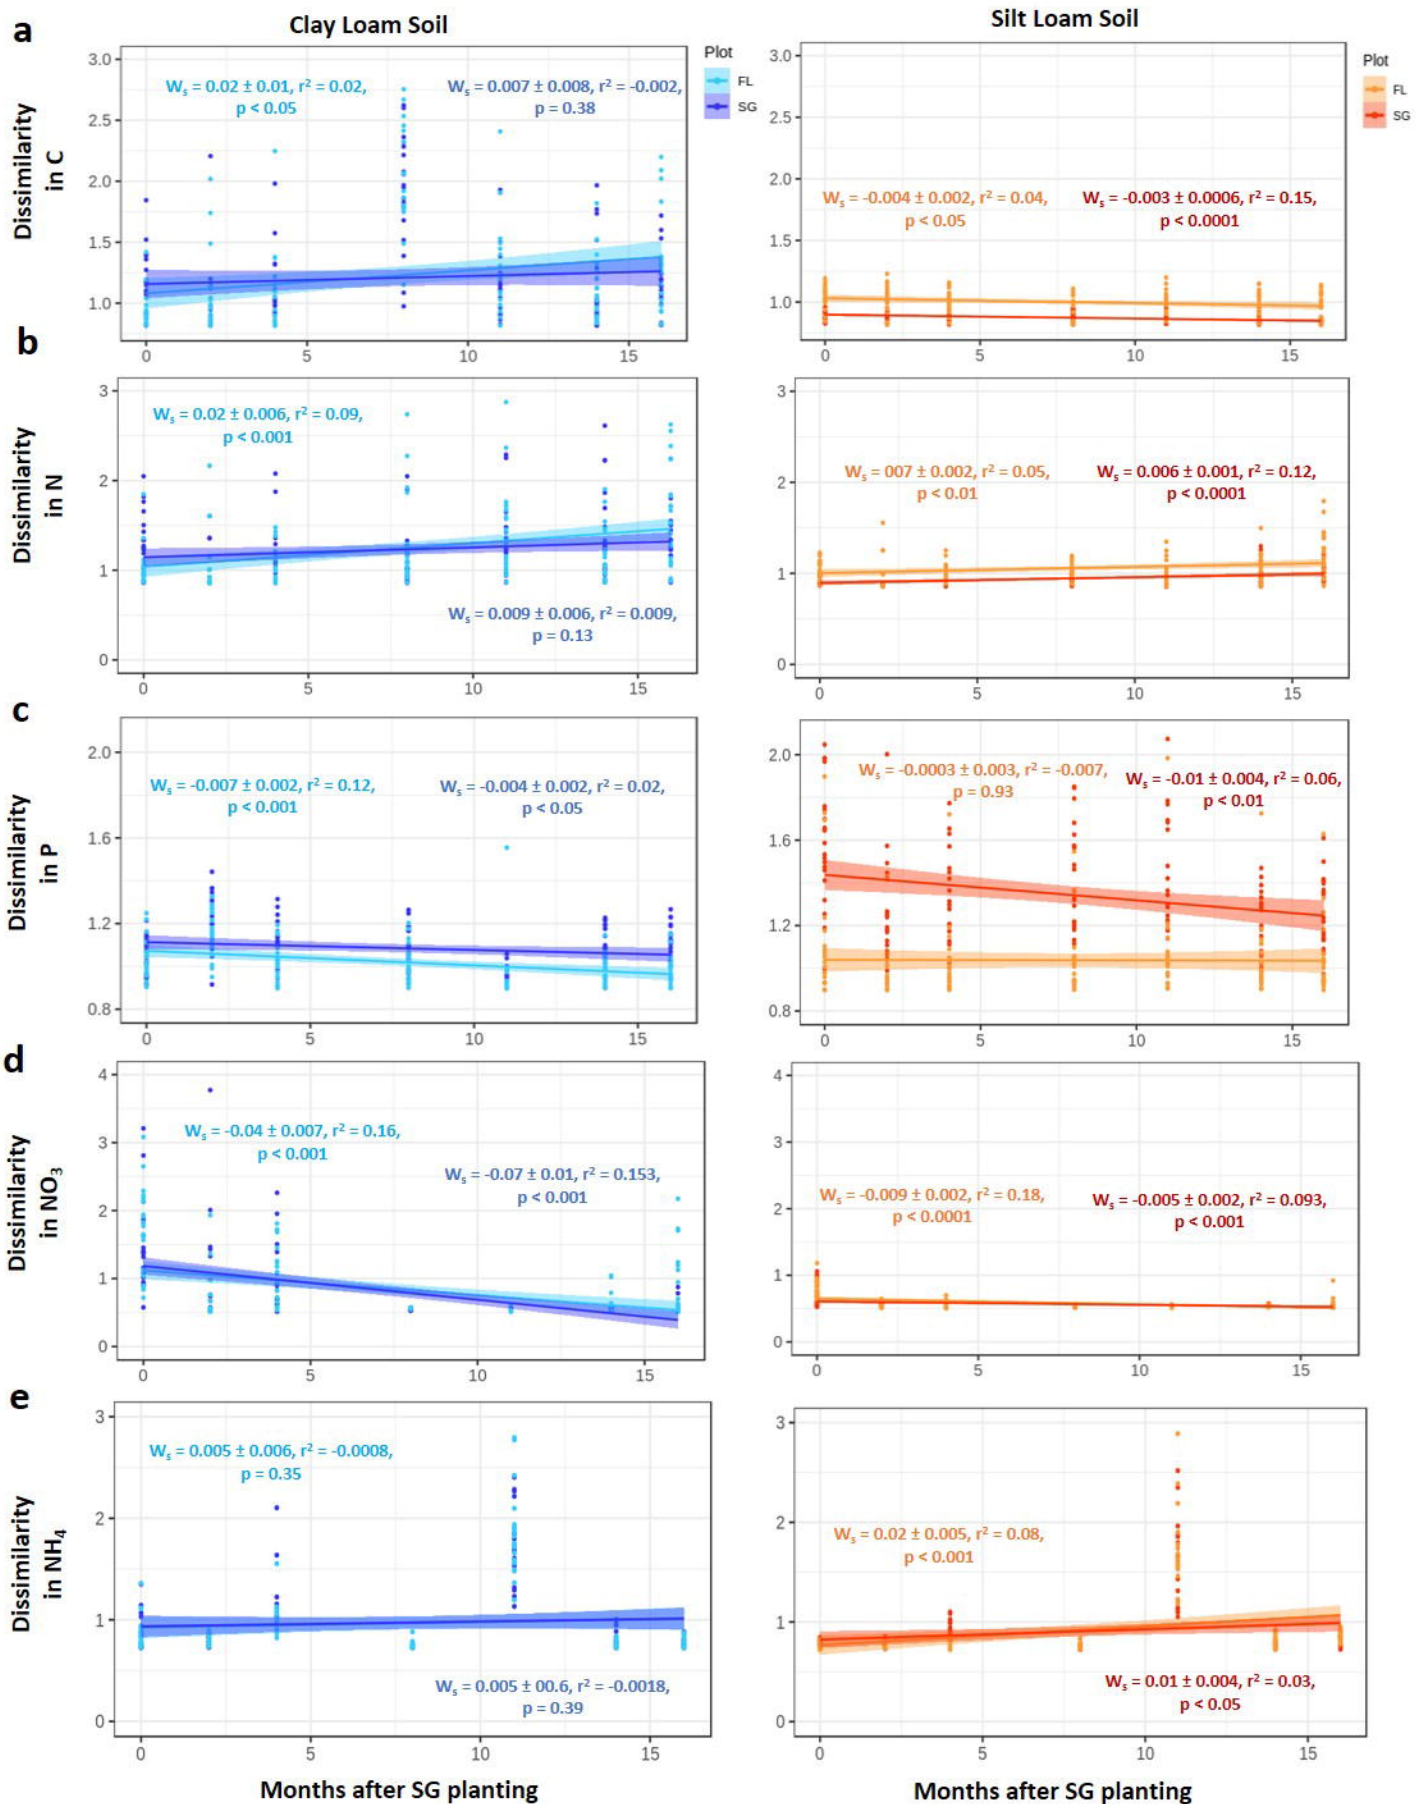

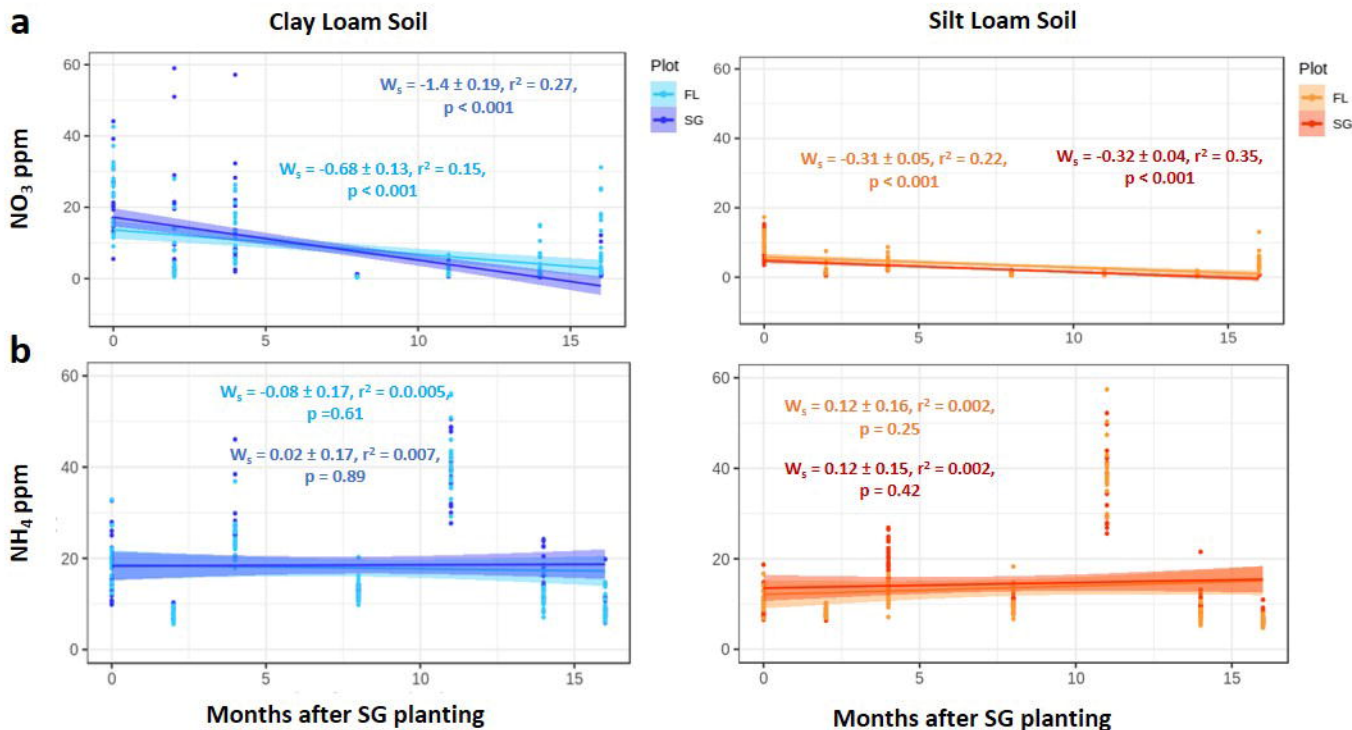

**Fig. S4, Changes in soil chemistry through the seasons at each site between SG and FL plots for: a, concentration of nitrate content; b, ammonium content.  $W_s$  is the slope of each line and the error associated with each slope while p-values represent the significance of each trend line. Each time point is comprised of twenty-one replicates per plot.**

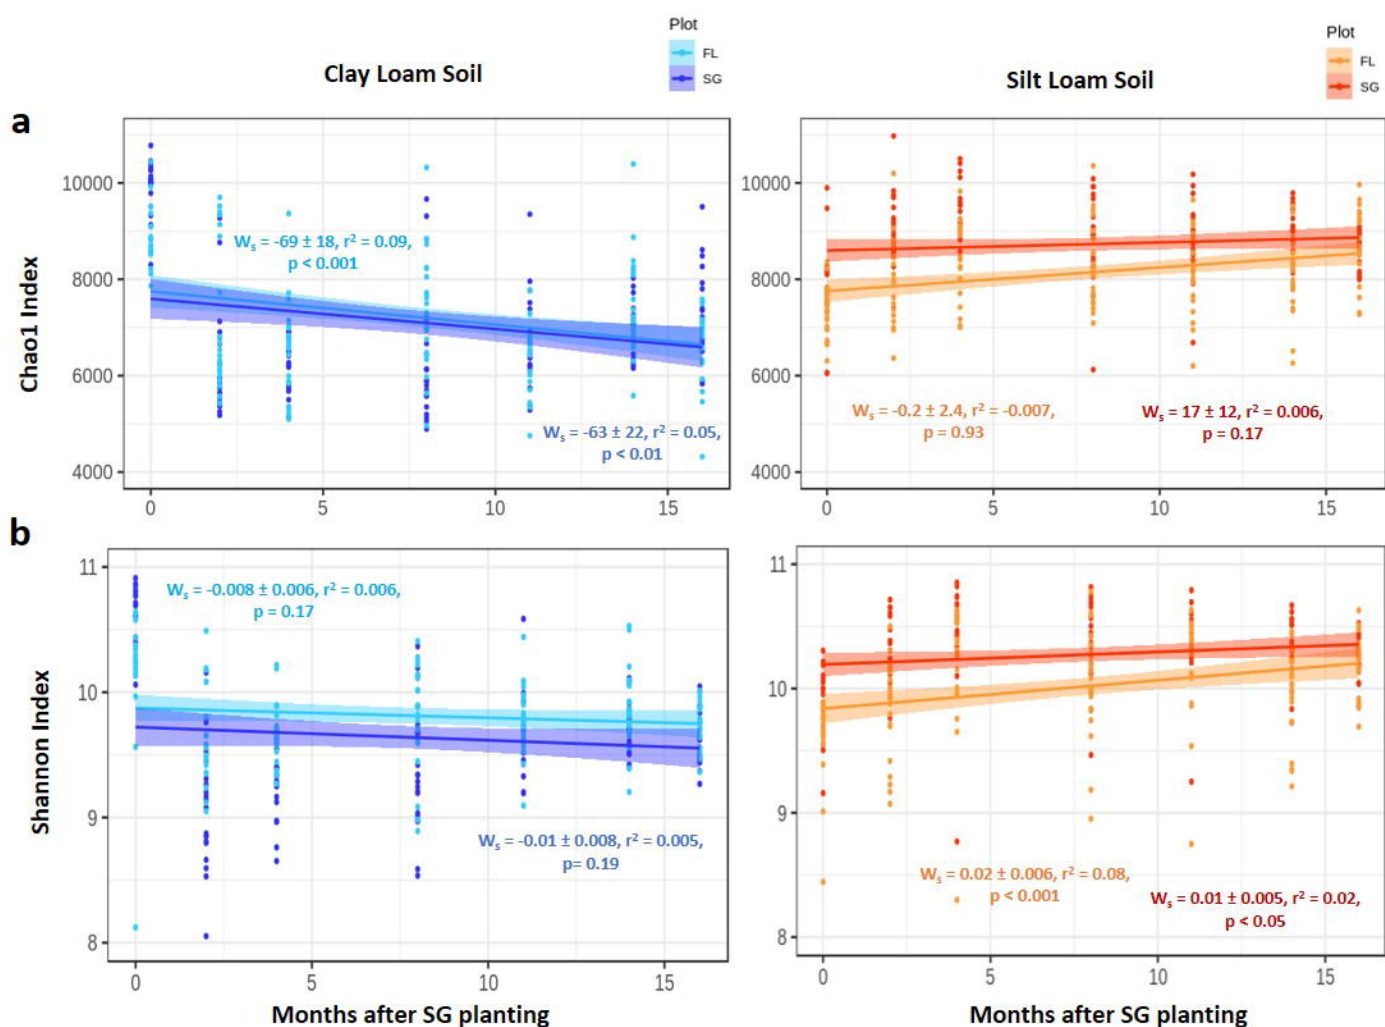

**Fig. S5, Change in microbial alpha diversity measures through the seasons at each site between SG and FL plots for: a, chao1 index; b, Shannon index.  $W_s$  is the slope of each line and the error associated with each slope while p-values represent the significance of each trend line. Each time point is comprised of twenty-one replicates per plot.**

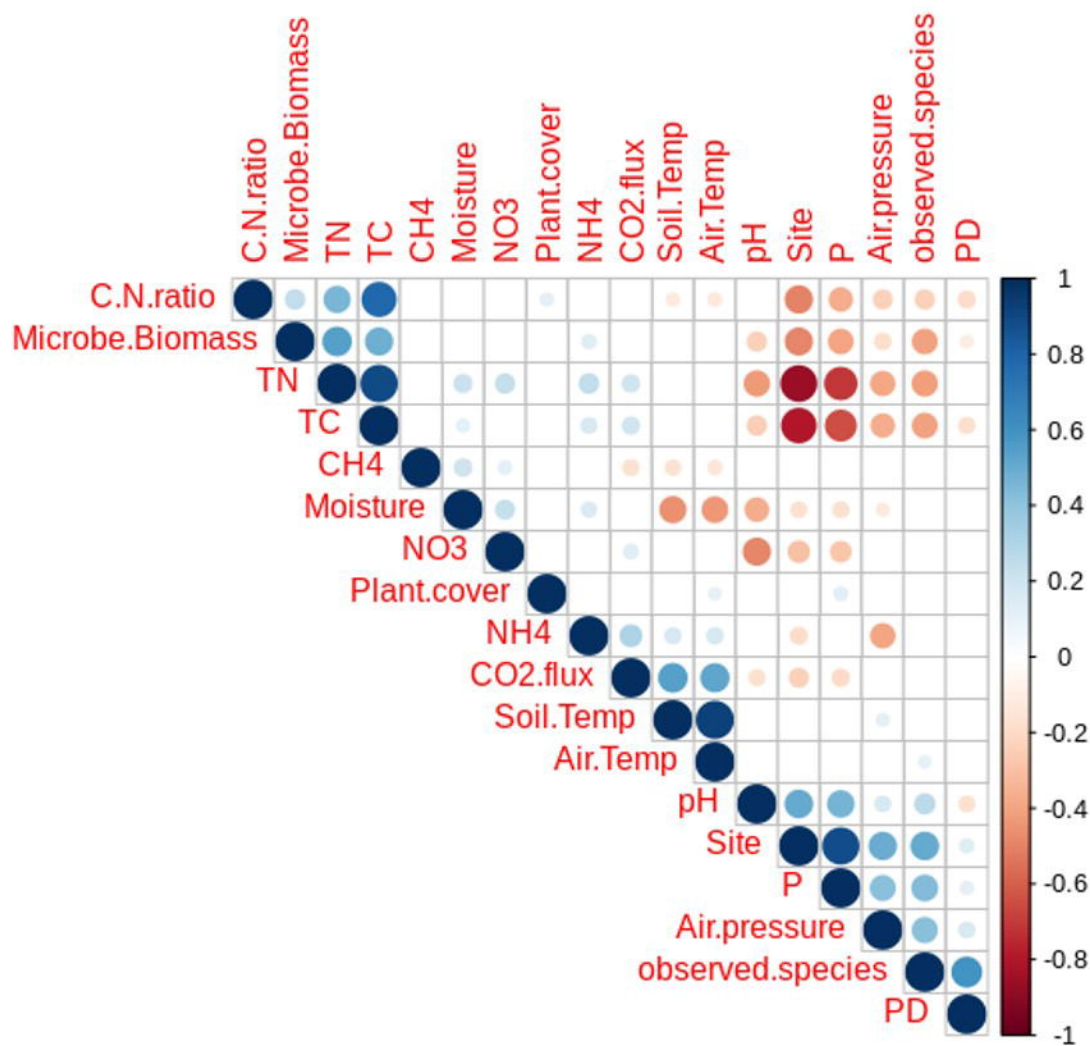

**Fig. S6, Correlation plot between environmental, microbial, and soil geochemistry variables.** Blue circles indicate significant positive correlations while red circles indicate negative correlations. Larger darker circles indicate a more significant and stronger correlation between variables. Positive correlations for site represent SL site while negative correspond to the CL site. ‘Microbe.Biomass’ was estimated using DNA concentrations after soil extractions. ‘observed.species’ is the total species richness (alpha diversity) of the samples. ‘PD’ represents the whole tree phylogenetic diversity of the plots. Positive correlations for ‘Plant.cover’ represent switchgrass plots and negative for fallow plots.
